# Supplementary material for: Density-based quantification of steric effects: validation by Taft steric parameters from acid-catalyzed hydrolysis of esters
Source: Royal Society of Chemistry journal article supplement (doi:10.1039/d4cp02702g), 2024-01-01
Supplement: d4cp02702g1.pdf [file d4cp02702g1.pdf]

Supplementary Information for

**Density-Based Quantification of Steric Effect: Validation by Taft Steric Parameters from Acid-Catalyzed Hydrolysis of Esters**

Jingwen Zhang,<sup>1</sup> Xin He,<sup>2</sup> Bin Wang,<sup>3</sup> Chunying Rong,<sup>1\*</sup> Dongbo Zhao,<sup>4\*</sup> and Shubin Liu<sup>5,6\*</sup>

<sup>1</sup> College of Chemistry and Chemical Engineering,  
Hunan Normal University, Changsha, Hunan 410081, China

<sup>2</sup> Institute of Frontier Chemistry, School of Chemistry and Chemical Engineering,  
Shandong University, Qingdao, Shandong 266237, China

<sup>3</sup> Research Group of General Chemistry (ALGC), Vrije Universiteit Brussel (VUB),  
Pleinlaan 2, 1050 Brussels, Belgium

<sup>4</sup> Institute of Biomedical Research, Yunnan University, Kunming 650500, Yunnan, China

<sup>5</sup> Research Computing Center, University of North Carolina, Chapel Hill NC 27599-3420, USA

<sup>6</sup> Department of Chemistry, University of North Carolina, Chapel Hill NC 27599-3290, USA  
E-mail: shubin@email.unc.edu

**Cartesian coordinates**

**(a) Reactant and transition state structures of 1-water mechanism for H, CH<sub>3</sub> and t-butyl groups.**

1-Water Mechanism, Group H

Step 1, Reactant

|   |          |          |          |
|---|----------|----------|----------|
| O | -0.94853 | -1.70087 | 0.92107  |
| O | 0.94302  | -0.66927 | -0.86786 |
| C | 1.94152  | -1.73616 | -0.84461 |
| H | 2.90701  | -1.30830 | -0.58839 |
| H | 1.62006  | -2.47285 | -0.11174 |
| H | 1.93473  | -2.13738 | -1.85040 |
| C | 0.70997  | -0.03356 | 0.18827  |
| H | -1.69089 | -1.97995 | 0.37588  |
| O | 1.43647  | -0.21494 | 1.21881  |
| H | 1.16385  | 0.33098  | 1.97482  |
| H | -1.20907 | -1.89583 | 1.82671  |
| H | -0.08204 | 0.70712  | 0.15965  |

Transition State

|   |          |          |          |
|---|----------|----------|----------|
| O | -0.78906 | -1.39674 | 0.60502  |
| O | 1.02554  | -0.59981 | -0.79026 |
| C | 1.99271  | -1.67467 | -0.81140 |
| H | 2.19162  | -1.85534 | -1.86323 |
| H | 2.90049  | -1.36426 | -0.29787 |
| H | 1.56982  | -2.56563 | -0.34621 |
| C | 0.47977  | -0.30251 | 0.37020  |
| H | -0.45477 | -2.24932 | 0.93685  |
| O | 1.24756  | -0.50600 | 1.43370  |
| H | 0.88297  | -0.05698 | 2.21156  |
| H | -1.25774 | -1.57244 | -0.23045 |
| H | -0.12285 | 0.59866  | 0.33667  |

Step 2, Reactant

|   |          |          |          |
|---|----------|----------|----------|
| O | 0.16482  | -1.75557 | -0.13076 |
| O | 1.08110  | 0.22647  | -0.52160 |
| C | 1.06222  | 1.66357  | -0.57118 |
| H | 0.10732  | 2.00889  | -0.97376 |
| H | 1.22809  | 2.07835  | 0.42295  |
| H | 1.87255  | 1.94829  | -1.23634 |
| C | 0.01666  | -0.28301 | 0.15079  |
| H | 1.00452  | -2.10388 | 0.23556  |
| O | 0.11202  | -0.06180 | 1.48530  |
| H | -0.76414 | -0.09543 | 1.89518  |
| H | -0.57703 | -2.28083 | 0.23194  |

Transition State

|   |          |          |          |
|---|----------|----------|----------|
| O | 0.15104  | -1.29957 | -0.13977 |
| O | 0.66834  | 0.58807  | -0.77228 |
| C | 1.26351  | 1.85982  | -0.40429 |
| H | 0.50319  | 2.62796  | -0.52150 |
| H | 1.63290  | 1.81504  | 0.61611  |
| H | 2.07121  | 2.00654  | -1.11357 |
| C | -0.41202 | 0.03647  | 0.00765  |
| H | 1.03936  | -0.59973 | -0.61538 |
| O | -0.39029 | 0.44768  | 1.27642  |
| H | -1.26707 | 0.71550  | 1.57991  |
| H | 0.31037  | -1.72207 | 0.72278  |

|   |          |          |          |   |          |         |          |
|---|----------|----------|----------|---|----------|---------|----------|
| H | -0.95927 | -0.04184 | -0.27391 | H | -1.35922 | 0.10680 | -0.51744 |
|---|----------|----------|----------|---|----------|---------|----------|

### 1-Water Mechanism, Group CH3

#### Step 1, Reactant

|   |          |          |          |
|---|----------|----------|----------|
| O | -0.92699 | -1.75202 | 0.89272  |
| O | 0.94459  | -0.62746 | -0.87064 |
| C | 1.88503  | -1.73878 | -0.80740 |
| H | 2.86880  | -1.35726 | -0.54628 |
| H | 1.51652  | -2.44291 | -0.06478 |
| H | 1.87400  | -2.16242 | -1.80439 |
| C | 0.72038  | 0.05304  | 0.17084  |
| H | -1.65545 | -2.05869 | 0.34399  |
| O | 1.43777  | -0.18976 | 1.20747  |
| H | 1.20599  | 0.36811  | 1.96690  |
| H | -1.14201 | -2.04370 | 1.78393  |
| C | -0.27841 | 1.13827  | 0.11478  |
| H | -0.90119 | 1.10170  | 1.00779  |
| H | 0.25839  | 2.09056  | 0.09382  |
| H | -0.88369 | 1.03297  | -0.78049 |

#### Transition State

|   |          |          |          |
|---|----------|----------|----------|
| O | -0.71069 | -1.36286 | 0.82656  |
| O | 0.88472  | -0.69072 | -0.84012 |
| C | 1.85222  | -1.76025 | -0.81346 |
| H | 2.81401  | -1.38172 | -0.47201 |
| H | 1.50720  | -2.57000 | -0.16977 |
| H | 1.92360  | -2.10531 | -1.84083 |
| C | 0.42357  | -0.24510 | 0.32594  |
| H | -0.30871 | -2.11552 | 1.29605  |
| O | 1.33072  | -0.30044 | 1.31191  |
| H | 1.03296  | 0.21413  | 2.07681  |
| H | -1.23579 | -1.70928 | 0.08256  |
| C | -0.40329 | 0.99381  | 0.18927  |
| H | -0.80595 | 1.27892  | 1.16051  |
| H | 0.25185  | 1.78090  | -0.18544 |
| H | -1.21330 | 0.82270  | -0.51804 |

#### Step 2, Reactant

|   |          |          |          |
|---|----------|----------|----------|
| O | 0.11385  | -1.75976 | -0.14718 |
| O | 0.99400  | 0.22780  | -0.55228 |
| C | 1.06385  | 1.66240  | -0.59627 |
| H | 0.25906  | 2.06264  | -1.21433 |
| H | 1.01837  | 2.07675  | 0.41139  |
| H | 2.02486  | 1.89311  | -1.04798 |
| C | -0.06802 | -0.26412 | 0.15677  |
| C | -1.44324 | 0.08248  | -0.34053 |
| H | -1.63832 | 1.12968  | -0.10792 |
| H | -1.49730 | -0.07772 | -1.41600 |
| H | 1.03384  | -2.04069 | 0.03986  |
| O | 0.13870  | -0.08663 | 1.49059  |
| H | -0.69628 | -0.13984 | 1.97774  |
| H | -0.48626 | -2.31111 | 0.39314  |
| H | -2.18298 | -0.53659 | 0.16990  |

#### Transition State

|   |          |          |          |
|---|----------|----------|----------|
| O | 0.15835  | -1.29681 | -0.14316 |
| O | 0.65669  | 0.59971  | -0.79267 |
| C | 1.26453  | 1.85152  | -0.38767 |
| H | 0.50117  | 2.62500  | -0.43312 |
| H | 1.67689  | 1.76039  | 0.61313  |
| H | 2.04102  | 2.03794  | -1.12246 |
| C | -0.44789 | 0.04074  | -0.02242 |
| H | 1.02720  | -0.58148 | -0.61905 |
| O | -0.39521 | 0.45435  | 1.25266  |
| H | -1.26662 | 0.71132  | 1.58111  |
| H | 0.33526  | -1.68682 | 0.73067  |
| C | -1.75370 | 0.12702  | -0.74489 |
| H | -2.50038 | -0.46547 | -0.21614 |
| H | -2.07001 | 1.16991  | -0.78393 |
| H | -1.63152 | -0.25575 | -1.75579 |

### 1-Water Mechanism, Group tBu

#### Step 1, Reactant

|   |          |          |          |
|---|----------|----------|----------|
| O | -0.85721 | -1.97227 | 1.08794  |
| O | 0.90003  | -0.71017 | -0.89992 |
| C | 1.90712  | -1.76205 | -0.89225 |
| H | 2.88349  | -1.31255 | -0.72573 |
| H | 1.65713  | -2.47473 | -0.10923 |
| H | 1.83945  | -2.21198 | -1.87639 |
| C | 0.71601  | -0.01749 | 0.14712  |
| C | -0.28156 | 1.10204  | 0.10444  |
| H | -1.78654 | -1.73896 | 0.98196  |

#### Transition State

|   |          |          |          |
|---|----------|----------|----------|
| O | 0.06425  | -1.92132 | 0.00791  |
| O | 0.83600  | 0.31704  | -0.51214 |
| C | 2.17825  | 0.34918  | 0.01865  |
| H | 2.24029  | 1.07808  | 0.82466  |
| H | 2.46690  | -0.64141 | 0.37094  |
| H | 2.80519  | 0.64950  | -0.81566 |
| C | -0.11530 | -0.22484 | 0.22833  |
| C | -1.52027 | 0.04134  | -0.30894 |
| H | 0.28756  | -2.14451 | -0.91132 |

|   |          |          |          |   |          |          |          |
|---|----------|----------|----------|---|----------|----------|----------|
| O | 1.48986  | -0.24175 | 1.14587  | O | 0.10985  | -0.11197 | 1.53914  |
| H | 1.28475  | 0.31949  | 1.91509  | H | -0.66222 | -0.38890 | 2.05560  |
| H | -0.66924 | -1.77789 | 2.01342  | H | 0.76548  | -2.27982 | 0.57938  |
| C | -0.86906 | 1.36695  | 1.49401  | C | -1.81435 | 1.51822  | 0.00165  |
| H | -0.10912 | 1.68488  | 2.21330  | H | -1.05668 | 2.17465  | -0.43055 |
| H | -1.58327 | 2.18670  | 1.40323  | H | -2.78243 | 1.77434  | -0.43296 |
| H | -1.39163 | 0.49083  | 1.88148  | H | -1.86362 | 1.69281  | 1.07860  |
| C | -1.38677 | 0.79403  | -0.90654 | C | -2.56400 | -0.84204 | 0.38101  |
| H | -1.95027 | -0.09561 | -0.61935 | H | -3.55163 | -0.52363 | 0.04197  |
| H | -2.06931 | 1.64521  | -0.92843 | H | -2.43621 | -1.89417 | 0.12672  |
| H | -0.98219 | 0.65095  | -1.90887 | H | -2.55174 | -0.73591 | 1.47005  |
| C | 0.53627  | 2.32876  | -0.36311 | C | -1.55872 | -0.18880 | -1.82269 |
| H | -0.14472 | 3.18050  | -0.41108 | H | -1.27853 | -1.21040 | -2.09359 |
| H | 1.33877  | 2.55949  | 0.34046  | H | -2.58171 | -0.02505 | -2.16701 |
| H | 0.96139  | 2.16005  | -1.35418 | H | -0.90502 | 0.50758  | -2.34930 |

Step 2, Reactant

|   |          |          |          |
|---|----------|----------|----------|
| O | 0.09545  | -1.75152 | -0.06878 |
| O | 0.94281  | 0.18962  | -0.67239 |
| C | 1.27845  | 1.58801  | -0.69136 |
| H | 0.68832  | 2.09892  | -1.45215 |
| H | 1.12114  | 2.03807  | 0.28828  |
| H | 2.33343  | 1.63289  | -0.95116 |
| C | -0.08129 | -0.21114 | 0.14096  |
| C | -1.52109 | 0.09212  | -0.31464 |
| H | 1.04102  | -1.94119 | -0.23314 |
| O | 0.21886  | 0.04977  | 1.43426  |
| H | -0.56866 | 0.01940  | 1.99750  |
| H | -0.18770 | -2.26951 | 0.71033  |
| C | -1.88424 | 1.53725  | 0.06337  |
| H | -1.24302 | 2.27148  | -0.42329 |
| H | -2.90896 | 1.71800  | -0.26759 |
| H | -1.84785 | 1.69911  | 1.14314  |
| C | -2.50596 | -0.85884 | 0.38065  |
| H | -3.52012 | -0.54730 | 0.12489  |
| H | -2.37871 | -1.89019 | 0.04585  |
| H | -2.42086 | -0.82931 | 1.47113  |
| C | -1.61381 | -0.08538 | -1.83137 |
| H | -1.31244 | -1.08954 | -2.13636 |
| H | -2.65121 | 0.06702  | -2.13624 |
| H | -0.99302 | 0.64395  | -2.35558 |

Transition State

|   |          |          |          |
|---|----------|----------|----------|
| O | 0.06354  | -1.27276 | 0.16985  |
| O | 0.68145  | 0.53001  | -0.66709 |
| C | 1.33251  | 1.74150  | -0.21280 |
| H | 0.60235  | 2.54815  | -0.23046 |
| H | 1.73761  | 1.59773  | 0.78595  |
| H | 2.12426  | 1.92492  | -0.93364 |
| C | -0.52222 | 0.06273  | 0.02661  |
| C | -1.74600 | 0.06621  | -0.88205 |
| H | 0.98955  | -0.62952 | -0.31352 |
| O | -0.62696 | 0.63746  | 1.24049  |
| H | -1.50969 | 1.00546  | 1.38925  |
| H | 0.17944  | -1.49469 | 1.11182  |
| C | -2.90335 | -0.61986 | -0.14717 |
| H | -3.21515 | -0.07090 | 0.74501  |
| H | -3.76038 | -0.66865 | -0.82139 |
| H | -2.63474 | -1.63850 | 0.14248  |
| C | -1.43719 | -0.69431 | -2.17473 |
| H | -2.32172 | -0.65301 | -2.81304 |
| H | -0.60500 | -0.24324 | -2.71735 |
| H | -1.20894 | -1.74312 | -1.97815 |
| C | -2.09367 | 1.52263  | -1.21436 |
| H | -1.27368 | 2.00965  | -1.74761 |
| H | -2.97361 | 1.52839  | -1.86043 |
| H | -2.33101 | 2.10812  | -0.32208 |

**(b) Transition state structures of 2-water mechanism for H, CH<sub>3</sub> and t-butyl groups.**

2-Water Mechanism, Group H

Step 1, Reactant

|   |          |          |          |
|---|----------|----------|----------|
| O | -1.06767 | -1.80659 | 1.11062  |
| O | 0.76942  | -0.77545 | -0.85909 |
| C | 1.85854  | -1.74477 | -0.95003 |

Transition State

|   |          |          |          |
|---|----------|----------|----------|
| O | -0.98577 | 0.53750  | 1.11252  |
| O | 0.46517  | -0.29192 | -0.81905 |
| C | 1.05394  | -1.52991 | -0.34518 |

|   |          |          |          |   |          |          |          |
|---|----------|----------|----------|---|----------|----------|----------|
| H | 2.80312  | -1.21734 | -0.83992 | H | 2.13701  | -1.43129 | -0.32064 |
| H | 1.72055  | -2.48836 | -0.16797 | H | 0.65750  | -1.75608 | 0.64439  |
| H | 1.75541  | -2.17852 | -1.93788 | H | 0.74875  | -2.28017 | -1.06729 |
| C | 0.62690  | -0.11922 | 0.20643  | C | 0.55916  | 0.74551  | -0.06284 |
| H | -1.65185 | -1.53911 | 0.37789  | H | -1.59221 | -0.11042 | 0.67060  |
| O | 1.47260  | -0.23418 | 1.14929  | O | 1.52070  | 0.77970  | 0.81000  |
| H | 1.24974  | 0.33010  | 1.91192  | H | 1.57460  | 1.65034  | 1.23690  |
| H | -1.57370 | -1.64280 | 1.91344  | H | -0.68257 | 0.10964  | 1.92608  |
| O | -2.28115 | -0.79875 | -1.18449 | O | -2.48450 | -1.19400 | -0.26619 |
| H | -1.57744 | -0.92075 | -1.83283 | H | -1.88446 | -1.79097 | -0.72984 |
| H | -3.06396 | -1.18431 | -1.59381 | H | -3.08475 | -1.77034 | 0.22129  |
| H | -0.19914 | 0.58408  | 0.25405  | H | 0.14843  | 1.66153  | -0.46839 |

Step 2, Reactant

|   |          |          |          |
|---|----------|----------|----------|
| O | -0.79300 | -1.08364 | -0.15136 |
| O | 0.54786  | 0.70061  | -0.42888 |
| C | 1.58368  | 1.54388  | 0.08215  |
| H | 1.43505  | 1.71804  | 1.15152  |
| H | 2.56528  | 1.09971  | -0.08907 |
| H | 1.50727  | 2.48562  | -0.45630 |
| C | 0.41570  | -0.48205 | 0.27623  |
| H | -1.87613 | -0.22137 | -0.04213 |
| O | 1.49197  | -1.30785 | -0.01690 |
| H | 1.57116  | -1.98076 | 0.67223  |
| H | -0.68813 | -1.37975 | -1.07113 |
| O | -2.67122 | 0.49495  | 0.02892  |
| H | -2.28660 | 1.38816  | 0.00519  |
| H | -3.14019 | 0.39530  | 0.87483  |
| H | 0.31112  | -0.30848 | 1.35034  |

Transition State

|   |          |          |          |
|---|----------|----------|----------|
| O | 0.06611  | -1.26334 | 0.56423  |
| O | 0.91225  | 0.78848  | 0.36769  |
| C | 0.76308  | 2.14661  | -0.05094 |
| H | 0.22730  | 2.19151  | -1.00277 |
| H | 0.22825  | 2.72355  | 0.70501  |
| H | 1.76713  | 2.54602  | -0.17450 |
| C | -0.28878 | 0.08363  | 0.44084  |
| H | 1.83711  | -0.86579 | -0.20326 |
| O | -0.99850 | 0.54275  | 1.54854  |
| H | -1.92711 | 0.29654  | 1.44754  |
| H | 0.32004  | -1.42228 | 1.48611  |
| O | 2.68800  | -1.21474 | -0.57439 |
| H | 3.05148  | -0.57301 | -1.21277 |
| H | 2.52050  | -2.05963 | -1.03304 |
| H | -0.86588 | 0.19029  | -0.48121 |

Step 3, Reactant

|   |          |          |          |
|---|----------|----------|----------|
| O | -0.51870 | -1.54953 | -0.12794 |
| O | 0.80835  | 0.23593  | -0.53603 |
| C | 0.99830  | 1.66455  | -0.54956 |
| H | 0.14800  | 2.12537  | -1.05276 |
| H | 1.09631  | 2.04206  | 0.46856  |
| H | 1.91088  | 1.84748  | -1.11136 |
| C | -0.43089 | -0.19162 | 0.05978  |
| H | 1.87594  | -0.40281 | -0.09254 |
| O | -0.43158 | 0.10316  | 1.41542  |
| H | -0.80671 | 0.98126  | 1.56094  |
| H | 0.09822  | -1.99001 | 0.47567  |
| O | 2.76314  | -0.94304 | 0.28598  |
| H | 3.27806  | -1.31226 | -0.45039 |
| H | 3.34372  | -0.33807 | 0.77622  |
| H | -1.23957 | 0.30272  | -0.47789 |

Transition State

|   |          |          |          |
|---|----------|----------|----------|
| O | 0.36796  | -1.41764 | -0.31658 |
| O | 0.68342  | 0.84225  | -1.11827 |
| C | 0.59815  | 2.24389  | -0.78062 |
| H | -0.45817 | 2.45751  | -0.62595 |
| H | 1.17247  | 2.44951  | 0.12142  |
| H | 0.97793  | 2.81815  | -1.62275 |
| C | -0.09630 | -0.25931 | 0.03602  |
| H | 1.61351  | 0.57304  | -1.20910 |
| O | 0.28436  | 0.18167  | 1.22576  |
| H | -0.27259 | 0.91944  | 1.51879  |
| H | 1.23583  | -1.64163 | 0.17231  |
| O | 2.57181  | -1.94222 | 0.86374  |
| H | 2.83863  | -2.86513 | 0.76933  |
| H | 2.50517  | -1.79090 | 1.81501  |
| H | -1.10250 | -0.02187 | -0.29564 |

## Step 1, Reactant

|   |          |          |          |
|---|----------|----------|----------|
| O | -1.22606 | -1.47049 | 1.15527  |
| O | 0.66784  | -0.45544 | -0.84495 |
| C | 1.45430  | -1.65490 | -1.09546 |
| H | 2.51005  | -1.41590 | -0.98967 |
| H | 1.14607  | -2.42254 | -0.38803 |
| H | 1.21209  | -1.93332 | -2.11541 |
| C | 0.73317  | 0.10603  | 0.29202  |
| C | -0.08474 | 1.30756  | 0.53089  |
| H | -0.97579 | 1.27300  | -0.09124 |
| H | -0.33378 | 1.38215  | 1.58836  |
| H | -1.58375 | -1.51437 | 0.24930  |
| O | 1.57167  | -0.36135 | 1.14036  |
| H | 1.55851  | 0.12348  | 1.98429  |
| H | -1.82667 | -0.88657 | 1.63081  |
| O | -2.07758 | -1.56933 | -1.51015 |
| H | -1.33683 | -1.77334 | -2.09281 |
| H | -2.75294 | -2.21951 | -1.73462 |
| H | 0.52507  | 2.17141  | 0.24658  |

## Transition State

|   |          |          |          |
|---|----------|----------|----------|
| O | -0.95781 | 0.40036  | 1.14037  |
| O | 0.37692  | -0.37239 | -0.81358 |
| C | 1.05032  | -1.54007 | -0.29328 |
| H | 2.12680  | -1.38101 | -0.30538 |
| H | 0.69959  | -1.74250 | 0.71906  |
| H | 0.77470  | -2.34854 | -0.96362 |
| C | 0.39351  | 0.71903  | -0.09116 |
| C | -0.19859 | 1.91657  | -0.74743 |
| H | -1.16039 | 1.65678  | -1.18539 |
| H | -0.31324 | 2.71937  | -0.02126 |
| H | -1.60026 | -0.22136 | 0.69283  |
| O | 1.42942  | 0.83790  | 0.71709  |
| H | 1.45771  | 1.71739  | 1.12516  |
| H | -0.58342 | -0.08636 | 1.89017  |
| O | -2.50092 | -1.21531 | -0.24000 |
| H | -1.90306 | -1.80251 | -0.71957 |
| H | -3.10371 | -1.79969 | 0.23514  |
| H | 0.49183  | 2.22710  | -1.53462 |

## Step 2, Reactant

|   |          |          |          |
|---|----------|----------|----------|
| O | -0.84176 | -0.96675 | -0.53580 |
| O | 0.47751  | 0.83509  | -0.53701 |
| C | 1.54610  | 1.63609  | -0.02636 |
| H | 1.33040  | 1.96539  | 0.99197  |
| H | 2.49074  | 1.09029  | -0.05336 |
| H | 1.60993  | 2.50317  | -0.68027 |
| C | 0.38901  | -0.45502 | -0.01650 |
| C | 0.30971  | -0.52617 | 1.49081  |
| H | 1.24465  | -0.17917 | 1.92905  |
| H | -0.51413 | 0.09516  | 1.84566  |
| H | -1.90148 | -0.14213 | -0.27320 |
| O | 1.44087  | -1.19661 | -0.55091 |
| H | 1.54689  | -2.01056 | -0.04084 |
| H | -0.74969 | -1.07691 | -1.49691 |
| O | -2.70859 | 0.55061  | -0.07202 |
| H | -2.33509 | 1.39753  | 0.22532  |
| H | -3.27455 | 0.21027  | 0.64119  |
| H | 0.13926  | -1.56118 | 1.78954  |

## Transition State

|   |          |          |          |
|---|----------|----------|----------|
| O | 0.06264  | -1.24347 | 0.72386  |
| O | 0.87606  | 0.79419  | 0.42714  |
| C | 0.79855  | 2.14320  | -0.03638 |
| H | 0.61750  | 2.17376  | -1.11260 |
| H | 0.01405  | 2.68753  | 0.49257  |
| H | 1.76326  | 2.59646  | 0.18226  |
| C | -0.33594 | 0.08580  | 0.49701  |
| C | -1.14231 | 0.12229  | -0.78154 |
| H | -1.49023 | 1.13474  | -0.98286 |
| H | -0.52692 | -0.22627 | -1.61231 |
| H | 1.74837  | -0.85941 | -0.19960 |
| O | -1.03314 | 0.59200  | 1.60062  |
| H | -1.95294 | 0.30039  | 1.55129  |
| H | 0.39158  | -1.30265 | 1.63345  |
| O | 2.52529  | -1.16203 | -0.73916 |
| H | 2.71934  | -0.48193 | -1.41179 |
| H | 2.29791  | -1.99698 | -1.19035 |
| H | -2.00588 | -0.53499 | -0.67228 |

## Step 3, Reactant

|   |          |          |          |
|---|----------|----------|----------|
| O | -0.41545 | -1.61748 | -0.11671 |
| O | 0.78872  | 0.24068  | -0.57865 |
| C | 1.00801  | 1.67301  | -0.60990 |
| H | 0.37922  | 2.09990  | -1.38685 |
| H | 0.79066  | 2.10618  | 0.36597  |
| H | 2.05865  | 1.80593  | -0.85732 |
| C | -0.45533 | -0.25818 | 0.07297  |

## Transition State

|   |          |          |          |
|---|----------|----------|----------|
| O | -0.14664 | -1.57442 | -0.23510 |
| O | 0.85774  | 0.53180  | -0.91089 |
| C | 0.98310  | 1.95410  | -0.73954 |
| H | 0.13920  | 2.41737  | -1.24519 |
| H | 0.98707  | 2.21056  | 0.32185  |
| H | 1.91428  | 2.27586  | -1.20380 |
| C | -0.45168 | -0.34053 | 0.08683  |

|   |          |          |          |   |          |          |          |
|---|----------|----------|----------|---|----------|----------|----------|
| C | -1.64254 | 0.34358  | -0.62602 | C | -1.67504 | 0.22390  | -0.53925 |
| H | -1.68572 | 1.41939  | -0.45514 | H | -1.74289 | 1.29367  | -0.34553 |
| H | -1.58097 | 0.14113  | -1.69481 | H | -1.67029 | 0.02227  | -1.60789 |
| H | 1.69569  | -0.29854 | -0.18049 | H | 1.66453  | 0.08493  | -0.57171 |
| O | -0.36908 | 0.02045  | 1.42386  | O | -0.11855 | -0.00164 | 1.31882  |
| H | -0.77054 | 0.87807  | 1.61828  | H | -0.51678 | 0.84438  | 1.57662  |
| H | 0.21245  | -2.01298 | 0.50691  | H | 0.68878  | -1.83586 | 0.21289  |
| O | 2.71341  | -0.92156 | 0.28767  | O | 2.45349  | -1.22992 | 0.43721  |
| H | 3.24793  | -1.30543 | -0.42233 | H | 3.18997  | -1.75147 | 0.09644  |
| H | 3.29731  | -0.32670 | 0.77977  | H | 2.70409  | -0.97929 | 1.33473  |
| H | -2.53950 | -0.11823 | -0.21421 | H | -2.52744 | -0.27650 | -0.07350 |

## 2-Water Mechanism, Group tBu

### Step 1, Reactant

|   |          |          |          |
|---|----------|----------|----------|
| O | -0.94504 | -1.82774 | 0.52576  |
| O | 1.09530  | -0.42668 | -0.92114 |
| C | 2.05293  | -1.52252 | -0.94906 |
| H | 3.01180  | -1.16167 | -0.58386 |
| H | 1.67099  | -2.33317 | -0.33237 |
| H | 2.10908  | -1.81002 | -1.99304 |
| C | 0.79554  | 0.11048  | 0.18931  |
| C | -0.13211 | 1.28899  | 0.18970  |
| H | -1.79016 | -1.83547 | 0.04008  |
| O | 1.41969  | -0.30358 | 1.23112  |
| H | 1.15853  | 0.17159  | 2.03976  |
| H | -1.19276 | -1.78761 | 1.45573  |
| O | -3.30073 | -1.89100 | -1.00837 |
| H | -3.34633 | -2.70127 | -1.52853 |
| H | -4.11997 | -1.88059 | -0.50060 |
| C | -0.94272 | 1.36016  | 1.48772  |
| H | -0.31146 | 1.45422  | 2.37588  |
| H | -1.56284 | 2.25684  | 1.44182  |
| H | -1.59361 | 0.49201  | 1.59809  |
| C | -1.06058 | 1.23401  | -1.02334 |
| H | -1.69996 | 2.11813  | -0.99940 |
| H | -0.49860 | 1.24076  | -1.95777 |
| H | -1.69343 | 0.34532  | -0.99212 |
| C | 0.80692  | 2.51385  | 0.08777  |
| H | 0.18220  | 3.40857  | 0.06464  |
| H | 1.47340  | 2.57356  | 0.95071  |
| H | 1.40228  | 2.47588  | -0.82644 |

### Transition State

|   |          |          |          |
|---|----------|----------|----------|
| O | 0.78948  | -0.46140 | 1.40655  |
| O | 0.76419  | 0.74746  | -0.76839 |
| C | 1.79523  | 1.73889  | -0.56493 |
| H | 1.36167  | 2.73635  | -0.59903 |
| H | 2.28711  | 1.56078  | 0.39165  |
| H | 2.49168  | 1.59487  | -1.38552 |
| C | -0.13172 | 0.58435  | 0.16991  |
| C | -1.27312 | -0.34919 | -0.19757 |
| H | 1.52622  | -0.92333 | 0.91417  |
| O | -0.35111 | 1.65460  | 0.91138  |
| H | -1.09043 | 1.51624  | 1.52399  |
| H | 1.20858  | 0.15225  | 2.02837  |
| O | 2.64268  | -1.57656 | -0.09820 |
| H | 2.47593  | -1.14619 | -0.94708 |
| H | 2.45638  | -2.51038 | -0.25659 |
| C | -0.73074 | -1.66322 | -0.76349 |
| H | -0.22251 | -2.24930 | 0.00431  |
| H | -1.57411 | -2.24858 | -1.13529 |
| H | -0.04396 | -1.49036 | -1.59395 |
| C | -2.17671 | -0.62265 | 1.00648  |
| H | -2.68354 | 0.27980  | 1.36133  |
| H | -2.95605 | -1.31989 | 0.69357  |
| H | -1.62336 | -1.07311 | 1.83133  |
| C | -2.07250 | 0.39605  | -1.28301 |
| H | -1.47223 | 0.54607  | -2.18199 |
| H | -2.94318 | -0.20914 | -1.54249 |
| H | -2.42285 | 1.36572  | -0.92193 |

### Step 2, Reactant

|   |          |          |          |
|---|----------|----------|----------|
| O | 1.05177  | -0.47488 | 1.11656  |
| O | 0.64101  | 1.30939  | -0.11976 |
| C | -0.12106 | 2.36208  | -0.71562 |
| H | -0.40009 | 2.10061  | -1.73771 |
| H | -1.00950 | 2.59098  | -0.12710 |

### Transition State

|   |         |          |          |
|---|---------|----------|----------|
| O | 0.00344 | -1.17842 | 0.69291  |
| O | 0.90511 | 0.77032  | 0.24642  |
| C | 0.99518 | 2.18032  | 0.03726  |
| H | 0.93493 | 2.41372  | -1.02703 |
| H | 0.21492 | 2.70841  | 0.58530  |

|   |          |          |          |   |          |          |          |
|---|----------|----------|----------|---|----------|----------|----------|
| H | 0.53174  | 3.23351  | -0.73337 | H | 1.96932  | 2.48436  | 0.41797  |
| C | -0.03012 | 0.29996  | 0.57210  | C | -0.34817 | 0.16366  | 0.45602  |
| C | -0.90892 | -0.65061 | -0.28407 | C | -1.31413 | 0.19290  | -0.75852 |
| H | 2.15144  | -0.55156 | 0.30917  | H | 1.70750  | -0.92075 | -0.26026 |
| O | -0.70292 | 0.89685  | 1.63225  | O | -0.87683 | 0.74048  | 1.61445  |
| H | -1.38790 | 0.30656  | 1.97317  | H | -1.80676 | 0.49423  | 1.70436  |
| H | 1.34241  | -0.03135 | 1.93019  | H | 0.39518  | -1.21959 | 1.57781  |
| O | 3.05259  | -0.59841 | -0.29449 | O | 2.45115  | -1.30710 | -0.79573 |
| H | 2.99896  | 0.08244  | -0.98756 | H | 2.84430  | -0.59330 | -1.33272 |
| H | 3.10194  | -1.46125 | -0.73985 | H | 2.08438  | -1.98245 | -1.39760 |
| C | -0.13739 | -1.06027 | -1.54164 | C | -1.90599 | 1.59045  | -0.98960 |
| H | 0.77645  | -1.60572 | -1.29332 | H | -1.16866 | 2.30996  | -1.34256 |
| H | -0.76657 | -1.72265 | -2.14092 | H | -2.67719 | 1.50887  | -1.75948 |
| H | 0.12356  | -0.19360 | -2.15321 | H | -2.37705 | 1.98493  | -0.08619 |
| C | -1.24583 | -1.90783 | 0.53264  | C | -0.55336 | -0.25705 | -2.00935 |
| H | -1.77183 | -1.67068 | 1.46263  | H | -0.14821 | -1.26517 | -1.88923 |
| H | -1.90854 | -2.53978 | -0.06252 | H | -1.23764 | -0.26655 | -2.86115 |
| H | -0.35285 | -2.48287 | 0.77759  | H | 0.26847  | 0.42532  | -2.24148 |
| C | -2.23048 | 0.02027  | -0.68936 | C | -2.47869 | -0.77454 | -0.49719 |
| H | -2.09042 | 0.84850  | -1.38228 | H | -3.06271 | -0.49086 | 0.38410  |
| H | -2.84592 | -0.72843 | -1.19332 | H | -3.15563 | -0.74328 | -1.35390 |
| H | -2.78962 | 0.38010  | 0.17762  | H | -2.13395 | -1.80081 | -0.37047 |

Step 3, Reactant

|   |          |          |          |
|---|----------|----------|----------|
| O | -0.34372 | -1.48561 | 0.19377  |
| O | 0.81433  | 0.32563  | -0.46949 |
| C | 1.25413  | 1.70537  | -0.42130 |
| H | 0.89742  | 2.21232  | -1.31413 |
| H | 0.89153  | 2.18300  | 0.48655  |
| H | 2.34224  | 1.67189  | -0.41389 |
| C | -0.46375 | -0.12012 | 0.19128  |
| C | -1.67508 | 0.30769  | -0.66205 |
| H | 1.65694  | -0.36453 | -0.25268 |
| O | -0.44713 | 0.33949  | 1.48723  |
| H | -0.89820 | 1.19109  | 1.56449  |
| H | 0.23447  | -1.75503 | 0.92321  |
| O | 2.66937  | -1.15229 | 0.00245  |
| H | 2.95391  | -1.62737 | -0.79116 |
| H | 3.43896  | -0.65336 | 0.31087  |
| C | -1.99809 | 1.79938  | -0.50402 |
| H | -2.83587 | 2.03029  | -1.16524 |
| H | -2.32224 | 2.04872  | 0.51104  |
| H | -1.17152 | 2.45222  | -0.78259 |
| C | -2.88710 | -0.49784 | -0.17175 |
| H | -3.78084 | -0.12151 | -0.67372 |
| H | -2.78309 | -1.55836 | -0.40255 |
| H | -3.02820 | -0.38408 | 0.90601  |
| C | -1.40080 | -0.00730 | -2.13484 |

Transition State

|   |          |          |          |
|---|----------|----------|----------|
| O | -0.11529 | -0.89913 | 0.77809  |
| O | 0.82291  | 1.14131  | -0.45154 |
| C | 1.75661  | 1.63429  | 0.51442  |
| H | 1.33657  | 2.53274  | 0.96175  |
| H | 1.94511  | 0.88584  | 1.29001  |
| H | 2.69252  | 1.88170  | 0.01159  |
| C | -0.69678 | 0.22439  | 0.47122  |
| C | -1.68064 | 0.18676  | -0.67566 |
| H | 1.27992  | 0.41970  | -0.94929 |
| O | -0.83141 | 1.05468  | 1.46858  |
| H | -1.31719 | 1.85717  | 1.21537  |
| H | 0.32657  | -0.84912 | 1.64392  |
| O | 2.18959  | -0.84546 | -1.62074 |
| H | 3.02694  | -0.93172 | -1.14892 |
| H | 1.71188  | -1.66355 | -1.43472 |
| C | -2.13588 | 1.59307  | -1.06534 |
| H | -2.81693 | 1.50606  | -1.91361 |
| H | -2.69044 | 2.08432  | -0.26033 |
| H | -1.29387 | 2.22024  | -1.36072 |
| C | -2.88038 | -0.60995 | -0.11706 |
| H | -3.66506 | -0.61042 | -0.87563 |
| H | -2.60028 | -1.64240 | 0.09845  |
| H | -3.27599 | -0.14853 | 0.79042  |
| C | -1.09625 | -0.54634 | -1.88432 |

|   |          |          |          |   |          |          |          |
|---|----------|----------|----------|---|----------|----------|----------|
| H | -2.32109 | 0.14408  | -2.70319 | H | -1.90776 | -0.73258 | -2.59041 |
| H | -0.63267 | 0.65119  | -2.54619 | H | -0.34161 | 0.05620  | -2.39211 |
| H | -1.08395 | -1.04385 | -2.26827 | H | -0.66293 | -1.50821 | -1.60357 |

**(c) Transition state structures of 3-water mechanism for H, CH<sub>3</sub> and t-butyl groups.**

3-Water Mechanism, Group H

Step 1, Reactant

|   |          |          |          |
|---|----------|----------|----------|
| O | -0.98829 | -2.08400 | 0.87163  |
| O | 0.80600  | -0.76854 | -0.91472 |
| C | 1.94320  | -1.67197 | -1.06642 |
| H | 2.85871  | -1.11172 | -0.89131 |
| H | 1.82891  | -2.48704 | -0.35474 |
| H | 1.87873  | -2.02199 | -2.09013 |
| C | 0.60363  | -0.22695 | 0.20432  |
| H | -1.60141 | -1.74604 | 0.19686  |
| O | 1.43647  | -0.37885 | 1.15430  |
| H | 1.16666  | 0.10430  | 1.95708  |
| H | -1.50350 | -2.14034 | 1.69512  |
| O | -2.33928 | -0.75661 | -1.20434 |
| H | -1.63017 | -0.58901 | -1.83617 |
| H | -3.05315 | -1.13377 | -1.73064 |
| O | -2.44649 | -2.29041 | 3.27353  |
| H | -2.21208 | -1.64270 | 3.94757  |
| H | -2.33775 | -3.14452 | 3.70679  |
| H | -0.26107 | 0.42288  | 0.29577  |

Transition State

|   |          |          |          |
|---|----------|----------|----------|
| O | -1.50007 | -2.54083 | -0.08871 |
| O | 0.27838  | -0.71369 | -0.60164 |
| C | 1.52786  | -1.41819 | -0.83143 |
| H | 2.26847  | -1.07817 | -0.11094 |
| H | 1.35125  | -2.48880 | -0.74195 |
| H | 1.81527  | -1.15202 | -1.84281 |
| C | -0.34696 | -0.93922 | 0.49036  |
| H | -2.06688 | -2.14497 | -0.78325 |
| O | 0.28832  | -1.49173 | 1.46935  |
| H | -0.26240 | -1.52938 | 2.27024  |
| H | -2.06008 | -2.66438 | 0.70462  |
| O | -2.72639 | -1.03718 | -2.01907 |
| H | -1.96969 | -0.53149 | -2.33907 |
| H | -3.10430 | -1.44156 | -2.80838 |
| O | -2.68585 | -2.57006 | 2.39514  |
| H | -2.65732 | -1.64629 | 2.67226  |
| H | -2.08068 | -3.02341 | 2.99417  |
| H | -1.24340 | -0.35482 | 0.66266  |

Step 2, Reactant

|   |          |          |          |
|---|----------|----------|----------|
| O | 0.84628  | -0.11459 | -0.64964 |
| O | -0.92485 | 0.39825  | 0.63864  |
| C | -2.29677 | 0.79327  | 0.74279  |
| H | -2.51630 | 1.58483  | 0.02157  |
| H | -2.95701 | -0.05857 | 0.57414  |
| H | -2.43137 | 1.16897  | 1.75411  |
| C | -0.57542 | 0.01668  | -0.64095 |
| H | 1.32384  | 0.80176  | -0.38001 |
| O | -1.12993 | -1.21723 | -0.92419 |
| H | -1.18131 | -1.33343 | -1.88186 |
| H | 1.15803  | -0.92063 | -0.02258 |
| O | 1.94244  | 1.99259  | -0.00930 |
| H | 1.32399  | 2.57302  | 0.45462  |
| H | 2.25826  | 2.49594  | -0.77162 |
| O | 1.55715  | -2.01821 | 0.74942  |
| H | 1.98108  | -1.74022 | 1.57234  |
| H | 0.78109  | -2.53101 | 1.01387  |
| H | -0.83598 | 0.77313  | -1.38512 |

Transition State

|   |          |          |          |
|---|----------|----------|----------|
| O | -0.66042 | -0.12854 | 1.09116  |
| O | 0.95258  | 0.37770  | -0.36121 |
| C | 2.33614  | 0.35338  | -0.71410 |
| H | 2.95328  | 0.54463  | 0.16800  |
| H | 2.60397  | -0.60889 | -1.15342 |
| H | 2.48657  | 1.14429  | -1.44549 |
| C | 0.61763  | -0.49310 | 0.67955  |
| H | -0.47822 | 1.61350  | 0.24691  |
| O | 0.65989  | -1.79693 | 0.17725  |
| H | 0.68852  | -2.41192 | 0.92138  |
| H | -1.30503 | -0.48619 | 0.43537  |
| O | -0.90096 | 2.50850  | 0.16177  |
| H | -1.86296 | 2.41189  | 0.29365  |
| H | -0.73769 | 2.86363  | -0.73185 |
| O | -2.39017 | -1.16115 | -0.74360 |
| H | -2.79398 | -0.52241 | -1.34264 |
| H | -1.86458 | -1.73639 | -1.31242 |
| H | 1.30021  | -0.37035 | 1.52479  |

Step 3, Reactant

|   |         |         |          |
|---|---------|---------|----------|
| O | 0.76350 | 0.51817 | -1.15909 |
|---|---------|---------|----------|

Transition State

|   |         |         |          |
|---|---------|---------|----------|
| O | 0.85048 | 0.73749 | -0.71735 |
|---|---------|---------|----------|



|   |          |          |          |   |          |          |          |
|---|----------|----------|----------|---|----------|----------|----------|
| O | -0.72192 | -0.24944 | 0.36984  | O | -0.98130 | -0.38578 | 0.63995  |
| C | -1.58093 | -1.30664 | 0.86037  | C | -1.92759 | -1.45695 | 0.58673  |
| H | -2.12701 | -1.74623 | 0.02497  | H | -2.45651 | -1.45708 | -0.36953 |
| H | -0.95965 | -2.04573 | 1.35978  | H | -1.37308 | -2.38768 | 0.70288  |
| H | -2.26318 | -0.84085 | 1.56685  | H | -2.64287 | -1.35840 | 1.40385  |
| C | 0.13342  | -0.62004 | -0.77571 | C | 0.29897  | -0.40000 | -0.87031 |
| H | -1.29909 | 0.70269  | 0.14909  | H | -1.44515 | 0.47230  | 0.48787  |
| O | 1.01881  | -1.57600 | -0.33210 | O | 0.99578  | -1.46450 | -0.57332 |
| H | 0.67407  | -2.45885 | -0.51977 | H | 0.53815  | -2.27358 | -0.85257 |
| H | 1.42465  | 0.76202  | -0.46390 | H | 1.69315  | 0.70079  | -0.09895 |
| O | -1.93204 | 1.79047  | -0.04085 | O | -1.95161 | 2.02487  | -0.02213 |
| H | -2.77411 | 1.64215  | -0.49485 | H | -2.80383 | 2.05983  | -0.47201 |
| H | -1.41378 | 2.37732  | -0.61062 | H | -1.30230 | 2.26541  | -0.69475 |
| O | 2.51814  | 1.05195  | 0.82181  | O | 2.86984  | 0.68069  | 0.75075  |
| H | 2.15568  | 1.65585  | 1.48081  | H | 2.70301  | 1.09191  | 1.60883  |
| H | 2.62233  | 0.21282  | 1.28687  | H | 3.11350  | -0.23424 | 0.94428  |
| H | -0.52674 | -0.98225 | -1.56395 | H | -0.51790 | -0.47982 | -1.58155 |

### 3-Water Mechanism, Group CH3

#### Step 1, Reactant

|   |          |          |          |
|---|----------|----------|----------|
| O | -0.84874 | -2.30242 | 0.93353  |
| O | 0.58314  | -0.37447 | -0.76457 |
| C | 1.52169  | -1.26948 | -1.42574 |
| H | 2.52870  | -0.87430 | -1.31327 |
| H | 1.42818  | -2.25771 | -0.97919 |
| H | 1.21151  | -1.27203 | -2.46503 |
| C | 0.68098  | -0.18301 | 0.48691  |
| C | -0.29307 | 0.70955  | 1.13732  |
| H | -1.25159 | 0.63729  | 0.62794  |
| H | -0.37976 | 0.46354  | 2.19420  |
| H | -1.27338 | -2.17377 | 0.06783  |
| O | 1.67751  | -0.70864 | 1.09674  |
| H | 1.66766  | -0.51981 | 2.05193  |
| H | -1.47705 | -1.94079 | 1.58241  |
| O | -1.99248 | -1.77074 | -1.59167 |
| H | -1.35584 | -1.34186 | -2.17505 |
| H | -2.35431 | -2.49704 | -2.11200 |
| H | 0.09365  | 1.72908  | 1.03741  |
| O | -2.62175 | -1.19219 | 2.83089  |
| H | -2.23646 | -0.44392 | 3.30101  |
| H | -2.89261 | -1.80491 | 3.52406  |

#### Transition State

|   |          |          |          |
|---|----------|----------|----------|
| O | -1.03548 | -1.97541 | 0.20425  |
| O | 0.85753  | -0.59157 | -0.70496 |
| C | 1.91309  | -1.57556 | -0.80877 |
| H | 2.74992  | -1.28134 | -0.17864 |
| H | 1.52667  | -2.55059 | -0.51573 |
| H | 2.19841  | -1.57198 | -1.85582 |
| C | 0.22240  | -0.49346 | 0.42156  |
| C | -0.74672 | 0.62847  | 0.53273  |
| H | -1.31470 | 0.72126  | -0.39038 |
| H | -1.40988 | 0.46719  | 1.38167  |
| H | -1.72669 | -1.71131 | -0.44660 |
| O | 0.85084  | -0.94880 | 1.47724  |
| H | 0.34575  | -0.77368 | 2.28851  |
| H | -1.47008 | -2.04787 | 1.08235  |
| O | -2.78511 | -1.14364 | -1.68947 |
| H | -3.50278 | -1.74914 | -1.90922 |
| H | -3.21991 | -0.31900 | -1.44219 |
| H | -0.16179 | 1.53756  | 0.69633  |
| O | -1.91217 | -1.93391 | 2.78613  |
| H | -2.11590 | -1.02896 | 3.05042  |
| H | -1.22047 | -2.22033 | 3.39447  |

#### Step 2, Reactant

|   |          |          |          |
|---|----------|----------|----------|
| O | -0.90972 | 0.11244  | 0.61442  |
| O | 0.67932  | -0.13892 | -0.93630 |
| C | 2.03804  | -0.19746 | -1.38148 |
| H | 2.53067  | 0.76707  | -1.24589 |
| H | 2.58613  | -0.97940 | -0.85310 |

#### Transition State

|   |          |          |          |
|---|----------|----------|----------|
| O | -0.60938 | -0.24052 | 1.08893  |
| O | 0.47675  | 0.44156  | -0.71375 |
| C | 1.64816  | 0.60176  | -1.51439 |
| H | 2.41349  | 1.16343  | -0.97513 |
| H | 2.04057  | -0.36973 | -1.82045 |

|   |          |          |          |   |          |          |          |
|---|----------|----------|----------|---|----------|----------|----------|
| H | 1.99522  | -0.43702 | -2.44158 | H | 1.34176  | 1.16162  | -2.39583 |
| C | 0.50889  | -0.09870 | 0.44301  | C | 0.56063  | -0.47098 | 0.35690  |
| C | 1.24459  | 1.01725  | 1.14543  | C | 1.75205  | -0.24667 | 1.26080  |
| H | 2.31851  | 0.84341  | 1.08681  | H | 2.68184  | -0.43948 | 0.72659  |
| H | 1.00070  | 1.97151  | 0.67618  | H | 1.74539  | 0.78063  | 1.62763  |
| H | -1.21972 | 1.02578  | 0.17210  | H | -0.71981 | 1.55299  | 0.29417  |
| O | 0.79025  | -1.36098 | 0.94688  | O | 0.55192  | -1.75177 | -0.21819 |
| H | 0.93715  | -1.30495 | 1.90070  | H | 0.83074  | -2.39479 | 0.44649  |
| H | -1.45251 | -0.70660 | 0.20772  | H | -1.36509 | -0.58787 | 0.56091  |
| O | -1.61217 | 2.24060  | -0.42979 | O | -1.18134 | 2.43461  | 0.29686  |
| H | -0.89406 | 2.58435  | -0.97850 | H | -0.72384 | 3.03517  | -0.32038 |
| H | -1.78718 | 2.92481  | 0.23002  | H | -1.15425 | 2.82214  | 1.19143  |
| H | 0.94337  | 1.03716  | 2.19338  | H | 1.68222  | -0.93098 | 2.10760  |
| O | -2.16206 | -1.82182 | -0.28453 | O | -2.64790 | -1.22345 | -0.45180 |
| H | -2.39870 | -1.69947 | -1.21367 | H | -3.04791 | -0.55210 | -1.01689 |
| H | -1.59367 | -2.60380 | -0.26125 | H | -2.21066 | -1.82902 | -1.06252 |

### Step 3, Reactant

|   |          |          |          |
|---|----------|----------|----------|
| O | 0.79749  | 0.18785  | -1.15419 |
| O | -0.53448 | 0.19242  | 0.66830  |
| C | -1.40891 | -0.42705 | 1.64265  |
| H | -2.35295 | -0.70098 | 1.17354  |
| H | -0.89947 | -1.29713 | 2.04977  |
| H | -1.56408 | 0.31496  | 2.42176  |
| C | 0.08701  | -0.68728 | -0.39374 |
| C | -0.99465 | -1.36314 | -1.19197 |
| H | -1.54609 | -2.07179 | -0.57309 |
| H | -1.67769 | -0.61312 | -1.59231 |
| H | -1.02536 | 1.05372  | 0.19220  |
| O | 0.93011  | -1.54278 | 0.28193  |
| H | 0.48454  | -2.38013 | 0.46734  |
| H | 1.56600  | 0.52345  | -0.62586 |
| O | -1.61543 | 2.10411  | -0.37097 |
| H | -2.57359 | 2.07292  | -0.23988 |
| H | -1.47465 | 2.07935  | -1.32825 |
| H | -0.51991 | -1.90032 | -2.01297 |
| O | 2.87987  | 1.03493  | 0.31546  |
| H | 2.62674  | 1.69169  | 0.97494  |
| H | 3.19524  | 0.27993  | 0.82686  |

### Transition State

|   |          |          |          |
|---|----------|----------|----------|
| O | 0.88000  | 0.49494  | -0.94335 |
| O | -0.67705 | 0.04380  | 0.87309  |
| C | -1.59690 | -0.84394 | 1.51921  |
| H | -2.47998 | -1.00296 | 0.89819  |
| H | -1.08153 | -1.78977 | 1.68712  |
| H | -1.88631 | -0.41565 | 2.47896  |
| C | 0.32317  | -0.61551 | -0.56824 |
| C | -0.75845 | -1.15558 | -1.43756 |
| H | -1.27463 | -1.98039 | -0.94791 |
| H | -1.45718 | -0.36016 | -1.69250 |
| H | -1.17740 | 0.82072  | 0.49871  |
| O | 1.12113  | -1.45025 | 0.07946  |
| H | 0.70276  | -2.31660 | 0.19916  |
| H | 1.69046  | 0.72110  | -0.36810 |
| O | -1.97416 | 2.02858  | -0.27102 |
| H | -2.90555 | 1.80811  | -0.39442 |
| H | -1.60587 | 2.06204  | -1.16298 |
| H | -0.27823 | -1.52482 | -2.34715 |
| O | 2.90838  | 1.08619  | 0.50015  |
| H | 2.68112  | 1.73743  | 1.17571  |
| H | 3.19891  | 0.30505  | 0.98801  |

### 3-Water Mechanism, Group tBu

#### Step 1, Reactant

|   |          |          |          |
|---|----------|----------|----------|
| O | -0.70352 | -2.21028 | 0.94046  |
| O | 0.46078  | -0.50805 | -1.14808 |
| C | 1.33289  | -1.50935 | -1.74566 |
| H | 2.32312  | -1.07726 | -1.87408 |
| H | 1.36130  | -2.38058 | -1.09423 |
| H | 0.87331  | -1.73814 | -2.70121 |

#### Transition State

|   |          |          |          |
|---|----------|----------|----------|
| O | -1.01055 | -1.67091 | 0.09032  |
| O | 1.05294  | -0.56193 | -0.71908 |
| C | 1.98067  | -1.66966 | -0.70677 |
| H | 2.79837  | -1.45512 | -0.02147 |
| H | 1.45689  | -2.57916 | -0.41674 |
| H | 2.34402  | -1.74337 | -1.72705 |

|   |          |          |          |   |          |          |          |
|---|----------|----------|----------|---|----------|----------|----------|
| C | 0.68751  | -0.11585 | 0.03785  | C | 0.33654  | -0.34560 | 0.34511  |
| C | -0.17602 | 0.96088  | 0.62252  | C | -0.42236 | 0.97129  | 0.35156  |
| H | -0.05945 | -2.34643 | 1.65554  | H | -1.81936 | -1.42179 | -0.41596 |
| O | 1.73505  | -0.57371 | 0.62040  | O | 0.84061  | -0.83466 | 1.46063  |
| H | 1.83565  | -0.23867 | 1.53011  | H | 0.31376  | -0.58227 | 2.23659  |
| H | -0.55074 | -2.92151 | 0.29499  | H | -1.32401 | -1.92506 | 0.99140  |
| O | 1.13794  | -2.27902 | 3.11713  | O | -3.36120 | -1.12364 | -1.17662 |
| H | 2.03060  | -2.31253 | 2.75335  | H | -4.00587 | -1.80118 | -0.94028 |
| H | 1.06166  | -1.39020 | 3.48510  | H | -3.72594 | -0.30057 | -0.82885 |
| O | -0.45761 | -4.25355 | -1.01141 | O | -1.73369 | -2.23625 | 2.63841  |
| H | -0.34866 | -3.91400 | -1.90711 | H | -1.78169 | -1.41239 | 3.13847  |
| H | -1.25587 | -4.79257 | -1.04877 | H | -1.03722 | -2.74653 | 3.06883  |
| C | -0.30556 | 0.79433  | 2.13962  | C | -1.57851 | 0.96750  | 1.35387  |
| H | 0.65967  | 0.84529  | 2.65279  | H | -2.00167 | 1.97344  | 1.38162  |
| H | -0.90869 | 1.62261  | 2.51484  | H | -2.36729 | 0.27163  | 1.06274  |
| H | -0.80141 | -0.14306 | 2.39590  | H | -1.25180 | 0.73194  | 2.37111  |
| C | -1.55141 | 0.96628  | -0.04391 | C | 0.62042  | 2.02324  | 0.78176  |
| H | -1.47312 | 1.14302  | -1.11713 | H | 1.48610  | 2.01612  | 0.11618  |
| H | -2.07442 | 0.02396  | 0.12616  | H | 0.15126  | 3.00754  | 0.73028  |
| H | -2.13656 | 1.77506  | 0.39689  | H | 0.95625  | 1.85195  | 1.80663  |
| C | 0.57667  | 2.27319  | 0.30085  | C | -0.92751 | 1.30327  | -1.05324 |
| H | -0.01839 | 3.09953  | 0.69385  | H | -1.57733 | 0.52189  | -1.44959 |
| H | 1.55966  | 2.29100  | 0.77596  | H | -1.50144 | 2.23054  | -1.00035 |
| H | 0.69361  | 2.40353  | -0.77666 | H | -0.09900 | 1.45277  | -1.74668 |

Step 2, Reactant

|   |          |          |          |
|---|----------|----------|----------|
| O | 1.05354  | 0.35457  | -0.66422 |
| O | 0.31562  | -0.25939 | 1.33179  |
| C | -0.41840 | -1.01784 | 2.29971  |
| H | -1.24275 | -0.42473 | 2.69705  |
| H | -0.79211 | -1.94843 | 1.87350  |
| H | 0.28285  | -1.24512 | 3.10104  |
| C | -0.00987 | -0.39786 | -0.01311 |
| C | -1.36640 | 0.19944  | -0.46374 |
| H | 1.30623  | 1.23478  | -0.13479 |
| O | 0.17258  | -1.72148 | -0.36882 |
| H | -0.31607 | -1.92649 | -1.17703 |
| H | 1.92255  | -0.24911 | -0.73524 |
| O | 1.71861  | 2.39525  | 0.58679  |
| H | 1.23981  | 2.41046  | 1.42699  |
| H | 1.44230  | 3.19583  | 0.12071  |
| O | 3.07111  | -1.07004 | -0.87348 |
| H | 3.81717  | -0.74923 | -0.34936 |
| H | 2.86519  | -1.94940 | -0.52833 |
| C | -1.49310 | 1.63262  | 0.05967  |
| H | -0.74926 | 2.29555  | -0.38866 |
| H | -2.48163 | 2.01502  | -0.20465 |
| H | -1.39272 | 1.67053  | 1.14710  |

Transition State

|   |          |          |          |
|---|----------|----------|----------|
| O | 0.79809  | -0.14471 | -1.07839 |
| O | 0.56430  | 0.31820  | 1.05214  |
| C | 0.05581  | 0.23231  | 2.38321  |
| H | -0.74217 | 0.96003  | 2.54087  |
| H | -0.30204 | -0.77414 | 2.60107  |
| H | 0.89006  | 0.46702  | 3.04312  |
| C | -0.03256 | -0.42864 | 0.01324  |
| C | -1.48196 | -0.00815 | -0.35336 |
| H | 1.39628  | 1.50080  | -0.23976 |
| O | 0.08441  | -1.77465 | 0.38477  |
| H | -0.46866 | -2.31894 | -0.19059 |
| H | 1.65610  | -0.59939 | -0.91510 |
| O | 1.76151  | 2.42160  | -0.34649 |
| H | 1.09162  | 3.05140  | -0.01804 |
| H | 1.90452  | 2.59112  | -1.29688 |
| O | 3.16504  | -1.40917 | -0.51888 |
| H | 3.80394  | -0.81175 | -0.11274 |
| H | 2.93705  | -2.03490 | 0.17924  |
| C | -1.55503 | 1.52018  | -0.43354 |
| H | -0.83152 | 1.91568  | -1.15138 |
| H | -2.55410 | 1.81434  | -0.76455 |
| H | -1.37090 | 1.98284  | 0.53935  |

|   |          |          |          |   |          |          |          |
|---|----------|----------|----------|---|----------|----------|----------|
| C | -1.43468 | 0.21314  | -1.99834 | C | -1.84394 | -0.59993 | -1.72442 |
| H | -1.41250 | -0.79365 | -2.42712 | H | -1.74526 | -1.68982 | -1.74346 |
| H | -2.38304 | 0.66574  | -2.29539 | H | -2.88793 | -0.36433 | -1.94352 |
| H | -0.62470 | 0.79700  | -2.43619 | H | -1.22423 | -0.18455 | -2.51925 |
| C | -2.54025 | -0.64073 | 0.06205  | C | -2.50626 | -0.52349 | 0.66726  |
| H | -2.68154 | -0.53356 | 1.13667  | H | -2.37526 | -0.09127 | 1.65822  |
| H | -3.45146 | -0.28797 | -0.42619 | H | -3.50390 | -0.24593 | 0.31805  |
| H | -2.42390 | -1.70118 | -0.17409 | H | -2.47679 | -1.61203 | 0.75577  |

Step 3, Reactant

|   |          |          |          |
|---|----------|----------|----------|
| O | 0.69357  | -0.77024 | -1.02757 |
| O | 0.70547  | 0.69635  | 0.66541  |
| C | 0.38828  | 1.29382  | 1.94172  |
| H | -0.42023 | 2.01339  | 1.82592  |
| H | 0.11985  | 0.50091  | 2.63559  |
| H | 1.29884  | 1.78618  | 2.27650  |
| C | -0.02714 | -0.50444 | 0.09203  |
| C | -1.49450 | -0.17901 | -0.26125 |
| H | 1.02812  | 1.41915  | -0.08461 |
| O | 0.14942  | -1.50580 | 1.01931  |
| H | -0.57596 | -1.52184 | 1.65797  |
| H | 1.60412  | -1.05832 | -0.76310 |
| O | 1.49407  | 2.32992  | -0.95564 |
| H | 0.81430  | 2.99601  | -1.13127 |
| H | 1.66074  | 1.89619  | -1.80487 |
| O | 3.14202  | -1.56275 | -0.27280 |
| H | 3.72338  | -0.82220 | -0.06278 |
| H | 3.04587  | -2.04449 | 0.55761  |
| C | -1.56368 | 1.14659  | -1.02461 |
| H | -1.30086 | 1.99524  | -0.38678 |
| H | -0.90020 | 1.14055  | -1.89250 |
| H | -2.58610 | 1.29461  | -1.37860 |
| C | -2.00659 | -1.31637 | -1.15811 |
| H | -1.86820 | -2.28928 | -0.68008 |
| H | -3.07503 | -1.16995 | -1.33050 |
| H | -1.49959 | -1.32403 | -2.12337 |
| C | -2.39458 | -0.11145 | 0.97994  |
| H | -2.07909 | 0.63854  | 1.70446  |
| H | -3.40065 | 0.15447  | 0.64908  |
| H | -2.47646 | -1.07978 | 1.48328  |

Transition State

|   |          |          |          |
|---|----------|----------|----------|
| O | 0.68914  | -0.87293 | -0.99190 |
| O | 0.81885  | 0.82366  | 0.67420  |
| C | 0.55439  | 1.48420  | 1.91802  |
| H | -0.24497 | 2.21731  | 1.80368  |
| H | 0.27078  | 0.72208  | 2.64324  |
| H | 1.47083  | 1.97396  | 2.24872  |
| C | -0.05490 | -0.65719 | 0.05686  |
| C | -1.48781 | -0.22427 | -0.23422 |
| H | 0.97636  | 1.49600  | -0.04756 |
| O | 0.18230  | -1.48421 | 1.06974  |
| H | -0.48218 | -1.39453 | 1.76983  |
| H | 1.57044  | -1.30249 | -0.73517 |
| O | 1.31686  | 2.73721  | -1.05034 |
| H | 0.67561  | 2.79945  | -1.76888 |
| H | 2.17419  | 2.64774  | -1.48402 |
| O | 2.93500  | -1.96200 | -0.35201 |
| H | 3.63593  | -1.30498 | -0.25897 |
| H | 2.85323  | -2.36805 | 0.52019  |
| C | -2.09630 | -1.38878 | -1.04103 |
| H | -3.15712 | -1.18125 | -1.19397 |
| H | -1.61563 | -1.48744 | -2.01523 |
| H | -2.00453 | -2.33473 | -0.50180 |
| C | -1.51446 | 1.05221  | -1.07498 |
| H | -1.22507 | 1.92361  | -0.48278 |
| H | -0.85687 | 0.97299  | -1.94344 |
| H | -2.53400 | 1.20913  | -1.43295 |
| C | -2.30534 | -0.03047 | 1.04504  |
| H | -1.89025 | 0.73779  | 1.69710  |
| H | -3.30939 | 0.28630  | 0.75633  |
| H | -2.41804 | -0.96080 | 1.61001  |

**(d) Transition state structures of 4-water mechanism for H, CH<sub>3</sub> and t-butyl groups.**

4-Water Mechanism, Group H

Step 1, Reactant

|   |          |          |          |
|---|----------|----------|----------|
| O | -1.35701 | -2.22529 | 1.14593  |
| O | 0.67928  | -0.74173 | -1.04947 |
| C | 1.63289  | -1.76424 | -1.41769 |
| H | 2.64434  | -1.38265 | -1.28986 |

Transition State

|   |          |          |          |
|---|----------|----------|----------|
| O | -1.11792 | -1.98480 | 0.57107  |
| O | 0.58784  | -0.70825 | -0.77477 |
| C | 1.70237  | -1.61533 | -0.94019 |
| H | 2.59474  | -1.18423 | -0.49064 |

|   |          |          |          |   |          |          |          |
|---|----------|----------|----------|---|----------|----------|----------|
| H | 1.47225  | -2.64472 | -0.79691 | H | 1.45971  | -2.57304 | -0.48148 |
| H | 1.43004  | -1.98287 | -2.46133 | H | 1.82437  | -1.72154 | -2.01336 |
| C | 0.70910  | -0.32533 | 0.18981  | C | 0.16448  | -0.50213 | 0.43306  |
| H | -1.71680 | -1.88860 | 0.30821  | H | -1.79105 | -1.79098 | -0.11886 |
| O | 1.52544  | -0.70342 | 1.01231  | O | 0.94550  | -0.75172 | 1.42148  |
| H | 1.25410  | -0.27804 | 2.44023  | H | 0.58208  | -0.37015 | 2.29616  |
| H | -1.48104 | -1.51599 | 1.79183  | H | -1.56590 | -1.88731 | 1.44346  |
| O | -2.09873 | -1.45247 | -1.47715 | O | -2.78651 | -1.21582 | -1.44436 |
| H | -2.76197 | -0.78746 | -1.69164 | H | -2.56476 | -1.63185 | -2.28561 |
| H | -1.24934 | -1.03561 | -1.67445 | H | -3.72733 | -1.38956 | -1.32425 |
| O | -1.49900 | -0.33951 | 3.40217  | O | -2.17583 | -1.52524 | 3.02591  |
| H | -1.98442 | 0.49622  | 3.39062  | H | -1.48205 | -0.95676 | 3.39963  |
| H | -1.84342 | -0.83617 | 4.15665  | H | -2.21975 | -2.29253 | 3.60733  |
| O | 0.96928  | -0.01040 | 3.38657  | O | 0.00855  | 0.18088  | 3.59733  |
| H | -0.06546 | -0.14731 | 3.45824  | H | -0.13526 | 1.13590  | 3.56990  |
| H | 1.41376  | -0.59433 | 4.02108  | H | 0.59919  | 0.02288  | 4.34560  |
| H | -0.07164 | 0.41050  | 0.39757  | H | -0.61875 | 0.24394  | 0.51972  |

Step 2, Reactant

|   |          |          |          |
|---|----------|----------|----------|
| O | -0.69520 | -1.33544 | 0.48303  |
| O | 1.01411  | -0.46884 | -0.77094 |
| C | 1.76859  | -1.67032 | -0.98970 |
| H | 2.67419  | -1.66828 | -0.38329 |
| H | 1.16729  | -2.55257 | -0.76629 |
| H | 2.03232  | -1.66451 | -2.04451 |
| C | 0.40991  | -0.36921 | 0.45299  |
| H | -1.38360 | -1.11065 | -0.26039 |
| O | 1.25161  | -0.68631 | 1.48622  |
| H | 0.94808  | -0.21989 | 2.29390  |
| H | -1.16979 | -1.33474 | 1.45161  |
| O | -2.30054 | -0.71277 | -1.34372 |
| H | -2.09114 | -1.16690 | -2.17004 |
| H | -3.22063 | -0.93531 | -1.15227 |
| O | -1.71689 | -1.25263 | 2.71150  |
| H | -1.14908 | -0.63581 | 3.21888  |
| H | -1.67242 | -2.10329 | 3.16678  |
| O | 0.12521  | 0.55755  | 3.65599  |
| H | -0.08796 | 1.49304  | 3.55248  |
| H | 0.56958  | 0.48436  | 4.50946  |
| H | -0.02024 | 0.62853  | 0.53861  |

Transition State

|   |          |          |          |
|---|----------|----------|----------|
| O | -0.81594 | -1.44138 | 0.73987  |
| O | 0.51801  | -0.39909 | -0.72865 |
| C | 1.39039  | -1.45800 | -1.15392 |
| H | 2.39678  | -1.30258 | -0.76642 |
| H | 1.01148  | -2.43016 | -0.83197 |
| H | 1.40449  | -1.41303 | -2.24115 |
| C | 0.15464  | -0.43330 | 0.62133  |
| H | -1.20174 | -1.10522 | -1.20465 |
| O | 1.27043  | -0.68565 | 1.41236  |
| H | 1.09782  | -0.30846 | 2.29783  |
| H | -1.33012 | -1.26394 | 1.55828  |
| O | -1.87333 | -1.27557 | -1.91658 |
| H | -1.42480 | -1.28152 | -2.78308 |
| H | -2.29122 | -2.14482 | -1.76871 |
| O | -1.95315 | -0.62342 | 3.06868  |
| H | -1.14130 | -0.26254 | 3.46927  |
| H | -2.25664 | -1.30602 | 3.67725  |
| O | 0.53801  | 0.40908  | 3.84388  |
| H | 0.60392  | 1.36880  | 3.91805  |
| H | 0.97654  | 0.06096  | 4.62968  |
| H | -0.28083 | 0.54066  | 0.85652  |

Step 3, Reactant

|   |          |          |          |
|---|----------|----------|----------|
| O | -1.04702 | 0.69453  | -1.13875 |
| O | -0.30432 | -0.73037 | 0.47194  |
| C | 0.78204  | -1.48146 | 1.06893  |
| H | 1.34967  | -1.98227 | 0.28348  |
| H | 1.40401  | -0.78608 | 1.62703  |
| H | 0.32252  | -2.20477 | 1.73774  |

Transition State

|   |          |          |          |
|---|----------|----------|----------|
| O | -1.46406 | 0.17888  | 0.52601  |
| O | 0.56519  | -0.50324 | -0.79161 |
| C | 1.09525  | -1.54823 | 0.03354  |
| H | 1.96552  | -1.15359 | 0.55468  |
| H | 0.34184  | -1.88393 | 0.75343  |
| H | 1.39511  | -2.38350 | -0.59914 |

|   |          |          |          |   |          |          |          |
|---|----------|----------|----------|---|----------|----------|----------|
| C | 0.10748  | 0.18391  | -0.64477 | C | -0.34603 | 0.77351  | 0.26591  |
| H | -1.10025 | -1.40181 | 0.12631  | H | -0.15539 | -0.89890 | -1.35033 |
| O | 0.92375  | 1.13088  | -0.10887 | O | 0.54993  | 1.02495  | 1.17881  |
| H | 1.86453  | 0.83053  | -0.17141 | H | 0.56367  | 0.40229  | 1.96068  |
| H | -1.39263 | 1.36898  | -0.50083 | H | -1.48555 | -0.40320 | 1.37878  |
| O | -2.06734 | -2.24242 | -0.24278 | O | -1.42038 | -1.63511 | -2.12823 |
| H | -1.70535 | -3.07011 | -0.58823 | H | -1.25184 | -2.56489 | -2.32256 |
| H | -2.58921 | -1.85747 | -0.96095 | H | -2.18233 | -1.63650 | -1.53568 |
| O | -1.90962 | 2.50845  | 0.65349  | O | -1.63637 | -1.25401 | 2.59426  |
| H | -2.51493 | 2.12287  | 1.29786  | H | -0.75977 | -1.20505 | 3.01878  |
| H | -1.13795 | 2.77546  | 1.16767  | H | -1.76469 | -2.18063 | 2.35664  |
| O | 3.39590  | 0.15757  | -0.30782 | O | 0.93433  | -0.57234 | 3.24589  |
| H | 3.53012  | -0.50551 | 0.38013  | H | 1.23052  | -0.10408 | 4.03665  |
| H | 4.10386  | 0.79987  | -0.17895 | H | 1.65465  | -1.16903 | 3.00432  |
| H | 0.59773  | -0.45349 | -1.38257 | H | -0.37048 | 1.48511  | -0.55057 |

#### 4-Water Mechanism, Group CH3

##### Step 1, Reactant

|   |          |          |          |
|---|----------|----------|----------|
| O | -1.07347 | -2.60653 | 0.67440  |
| O | 0.62427  | -0.42921 | -0.81512 |
| C | 1.69781  | -1.37298 | -1.07119 |
| H | 2.64732  | -0.90917 | -0.81235 |
| H | 1.52415  | -2.27237 | -0.48378 |
| H | 1.63769  | -1.57788 | -2.13486 |
| C | 0.41868  | -0.04111 | 0.39206  |
| C | -0.74898 | 0.83808  | 0.61993  |
| H | -1.58741 | 0.19032  | 0.89641  |
| H | -0.54957 | 1.52704  | 1.43985  |
| H | -1.49241 | -2.16944 | -0.08562 |
| O | 1.19666  | -0.43321 | 1.30113  |
| H | 0.95839  | -0.06944 | 2.27670  |
| H | -1.35563 | -2.10157 | 1.45689  |
| O | -2.05837 | -1.27687 | -1.64507 |
| H | -1.20463 | -0.89049 | -1.87782 |
| H | -2.27537 | -1.86331 | -2.37850 |
| H | -0.99551 | 1.37119  | -0.29559 |
| O | -1.79726 | -1.20146 | 3.01745  |
| H | -1.04633 | -0.66809 | 3.31874  |
| H | -1.97660 | -1.81151 | 3.74175  |
| O | 0.60658  | 0.34303  | 3.55548  |
| H | 1.24693  | 0.07103  | 4.22765  |
| H | 0.52225  | 1.30416  | 3.62804  |

##### Transition State

|   |          |          |          |
|---|----------|----------|----------|
| O | -1.01409 | -1.84535 | 0.47538  |
| O | 0.73698  | -0.65939 | -0.79297 |
| C | 1.76268  | -1.66895 | -0.89415 |
| H | 2.66727  | -1.32965 | -0.39283 |
| H | 1.40399  | -2.59962 | -0.45606 |
| H | 1.93838  | -1.79066 | -1.95870 |
| C | 0.23892  | -0.42165 | 0.39646  |
| C | -0.68610 | 0.74672  | 0.47002  |
| H | -1.34106 | 0.75878  | -0.39913 |
| H | -1.27146 | 0.70432  | 1.38821  |
| H | -1.67606 | -1.69680 | -0.24136 |
| O | 0.99384  | -0.73260 | 1.41198  |
| H | 0.64387  | -0.35164 | 2.27284  |
| H | -1.48458 | -1.76916 | 1.34186  |
| O | -2.61525 | -1.32928 | -1.63261 |
| H | -3.30914 | -1.96706 | -1.83668 |
| H | -3.07053 | -0.48387 | -1.54293 |
| H | -0.06768 | 1.64792  | 0.47475  |
| O | -2.09405 | -1.42787 | 2.90101  |
| H | -1.41030 | -0.86159 | 3.29831  |
| H | -2.14264 | -2.20592 | 3.46792  |
| O | 0.07178  | 0.23324  | 3.65075  |
| H | -0.05966 | 1.18933  | 3.61093  |
| H | 0.64483  | 0.07462  | 4.41166  |

##### Step 2, Reactant

|   |          |          |          |
|---|----------|----------|----------|
| O | -0.71729 | -1.25636 | 0.46785  |
| O | 0.97284  | -0.41546 | -0.82243 |
| C | 1.72138  | -1.62605 | -0.99811 |
| H | 2.63219  | -1.60440 | -0.40014 |

##### Transition State

|   |          |          |          |
|---|----------|----------|----------|
| O | -0.89202 | -1.26096 | 0.66667  |
| O | 0.56582  | -0.41240 | -0.78939 |
| C | 1.35572  | -1.57275 | -1.08419 |
| H | 2.35711  | -1.47055 | -0.66688 |

|   |          |          |          |   |          |          |          |
|---|----------|----------|----------|---|----------|----------|----------|
| H | 1.11937  | -2.49694 | -0.73558 | H | 0.88159  | -2.47762 | -0.69929 |
| H | 1.97631  | -1.66310 | -2.05470 | H | 1.41491  | -1.62500 | -2.16985 |
| C | 0.37163  | -0.25166 | 0.40267  | C | 0.13002  | -0.29659 | 0.54075  |
| C | -0.21834 | 1.13427  | 0.49374  | C | -0.39952 | 1.10846  | 0.73498  |
| H | -0.89045 | 1.30217  | -0.34779 | H | -1.18486 | 1.30425  | 0.00398  |
| H | -0.77446 | 1.23509  | 1.42756  | H | -0.81534 | 1.20689  | 1.73972  |
| H | -1.38518 | -1.13878 | -0.31477 | H | -1.19291 | -1.06745 | -1.27806 |
| O | 1.23654  | -0.57248 | 1.42387  | O | 1.19723  | -0.58985 | 1.39388  |
| H | 0.92755  | -0.17081 | 2.26245  | H | 0.99511  | -0.23579 | 2.28252  |
| H | -1.21207 | -1.21945 | 1.41729  | H | -1.32615 | -1.15692 | 1.54256  |
| O | -2.26971 | -0.95894 | -1.49138 | O | -1.85938 | -1.22405 | -1.99760 |
| H | -2.06336 | -1.60301 | -2.18083 | H | -1.40470 | -1.23600 | -2.86075 |
| H | -3.20057 | -1.10097 | -1.27689 | H | -2.29488 | -2.08560 | -1.85496 |
| H | 0.59177  | 1.86302  | 0.46919  | H | 0.41000  | 1.82715  | 0.60610  |
| O | -1.77738 | -1.08537 | 2.68234  | O | -1.88316 | -0.81799 | 3.17348  |
| H | -1.15512 | -0.54497 | 3.21318  | H | -1.09713 | -0.37768 | 3.54510  |
| H | -1.83771 | -1.94052 | 3.12721  | H | -1.98840 | -1.62451 | 3.69045  |
| O | 0.21958  | 0.45266  | 3.78250  | O | 0.51958  | 0.44942  | 3.88670  |
| H | 0.09293  | 1.40920  | 3.80371  | H | 0.49742  | 1.41417  | 3.89377  |
| H | 0.66005  | 0.22732  | 4.61101  | H | 1.03445  | 0.19586  | 4.66225  |

Step 3, Reactant

|   |          |          |          |
|---|----------|----------|----------|
| O | -0.95367 | 0.72565  | -1.15215 |
| O | -0.53256 | -0.53171 | 0.68635  |
| C | 0.31625  | -1.32319 | 1.55092  |
| H | 0.58649  | -2.25501 | 1.05615  |
| H | 1.19620  | -0.73080 | 1.79012  |
| H | -0.26212 | -1.51669 | 2.45101  |
| C | 0.10717  | 0.12813  | -0.54388 |
| C | 0.70674  | -0.94506 | -1.41325 |
| H | 1.52131  | -1.45433 | -0.89848 |
| H | -0.06401 | -1.66599 | -1.68794 |
| H | -1.39593 | -1.08791 | 0.37665  |
| O | 0.98203  | 1.04662  | -0.04745 |
| H | 1.89389  | 0.67233  | 0.03424  |
| H | -1.24385 | 1.49215  | -0.59779 |
| O | -2.51773 | -1.78424 | -0.02874 |
| H | -2.41427 | -2.73702 | 0.09918  |
| H | -2.64198 | -1.65689 | -0.97963 |
| H | 1.09736  | -0.46726 | -2.31216 |
| O | -1.62304 | 2.78535  | 0.46216  |
| H | -2.46498 | 2.67874  | 0.92048  |
| H | -0.95652 | 2.75390  | 1.15945  |
| O | 3.46566  | 0.08826  | 0.24543  |
| H | 4.12849  | 0.77412  | 0.10109  |
| H | 3.67359  | -0.59806 | -0.39990 |

Transition State

|   |          |          |          |
|---|----------|----------|----------|
| O | -1.43988 | 0.16994  | 0.47903  |
| O | 0.56409  | -0.57409 | -0.75226 |
| C | 1.05455  | -1.61609 | 0.10415  |
| H | 1.93860  | -1.23952 | 0.61475  |
| H | 0.28746  | -1.90618 | 0.82792  |
| H | 1.32256  | -2.47292 | -0.51310 |
| C | -0.29973 | 0.74142  | 0.17333  |
| H | -0.14823 | -0.96312 | -1.33798 |
| O | 0.58520  | 1.00532  | 1.11761  |
| H | 0.58361  | 0.38709  | 1.89297  |
| H | -1.44657 | -0.37923 | 1.33547  |
| O | -1.37644 | -1.59297 | -2.17830 |
| H | -1.24262 | -2.52075 | -2.40731 |
| H | -2.16568 | -1.58062 | -1.62238 |
| O | -1.59741 | -1.22604 | 2.61882  |
| H | -0.70911 | -1.17988 | 3.01806  |
| H | -1.73985 | -2.15537 | 2.40227  |
| O | 0.99303  | -0.57699 | 3.24866  |
| H | 1.28586  | -0.09383 | 4.03128  |
| H | 1.70992  | -1.18559 | 3.02937  |
| C | -0.37111 | 1.75649  | -0.91676 |
| H | -0.89765 | 2.62506  | -0.51528 |
| H | 0.63012  | 2.04647  | -1.22637 |
| H | -0.93256 | 1.35514  | -1.75902 |

## Step 1, Reactant

|   |          |          |          |
|---|----------|----------|----------|
| O | -0.48134 | -2.45261 | 1.12919  |
| O | 0.25578  | -0.45740 | -0.93906 |
| C | 1.29356  | -1.30213 | -1.49892 |
| H | 2.16778  | -0.69049 | -1.71424 |
| H | 1.53554  | -2.08989 | -0.78878 |
| H | 0.86267  | -1.70571 | -2.40937 |
| C | 0.44419  | 0.05870  | 0.21968  |
| C | -0.63501 | 0.96168  | 0.75997  |
| H | 0.07477  | -2.30152 | 1.91219  |
| O | 1.55121  | -0.15693 | 0.78781  |
| H | 1.76780  | 0.28630  | 1.72321  |
| H | -0.04319 | -3.15310 | 0.61724  |
| O | 0.96091  | -1.91441 | 3.52809  |
| H | 1.38897  | -1.04642 | 3.50097  |
| H | 0.23237  | -1.80494 | 4.15003  |
| O | 0.62654  | -4.51626 | -0.47067 |
| H | 0.68759  | -4.24329 | -1.39336 |
| H | 0.06644  | -5.30080 | -0.48294 |
| O | 2.27256  | 0.67634  | 2.98886  |
| H | 3.23686  | 0.75088  | 2.97208  |
| H | 1.93966  | 1.53178  | 3.29327  |
| C | -1.01114 | 0.55881  | 2.19361  |
| H | -0.15926 | 0.58405  | 2.87365  |
| H | -1.74795 | 1.27996  | 2.55342  |
| H | -1.45648 | -0.43620 | 2.21935  |
| C | -1.87381 | 0.90646  | -0.13358 |
| H | -1.65293 | 1.24435  | -1.14711 |
| H | -2.28130 | -0.10552 | -0.17875 |
| H | -2.63091 | 1.56637  | 0.29374  |
| C | -0.03554 | 2.38247  | 0.75185  |
| H | 0.27659  | 2.67160  | -0.25429 |
| H | -0.80702 | 3.07622  | 1.09110  |
| H | 0.82051  | 2.45682  | 1.42606  |

## Transition State

|   |          |          |          |
|---|----------|----------|----------|
| O | -1.05603 | -1.44440 | 0.55662  |
| O | 0.83149  | -0.57432 | -0.74101 |
| C | 1.71767  | -1.71246 | -0.72304 |
| H | 2.65283  | -1.44492 | -0.23444 |
| H | 1.23750  | -2.54396 | -0.20937 |
| H | 1.88832  | -1.95462 | -1.76781 |
| C | 0.32547  | -0.16865 | 0.39688  |
| C | -0.39270 | 1.17167  | 0.30812  |
| H | -1.64528 | -1.50218 | -0.23048 |
| O | 1.01516  | -0.49688 | 1.45834  |
| H | 0.60215  | -0.25186 | 2.33053  |
| H | -1.59719 | -1.39364 | 1.38087  |
| O | -2.41565 | -1.80405 | -1.75873 |
| H | -3.11742 | -2.46533 | -1.73907 |
| H | -2.82348 | -1.01685 | -2.13846 |
| O | -2.28993 | -1.39164 | 2.96582  |
| H | -1.52782 | -1.04912 | 3.46657  |
| H | -2.43035 | -2.28766 | 3.29251  |
| O | 0.11071  | -0.29415 | 3.93672  |
| H | 0.07168  | 0.56025  | 4.38466  |
| H | 0.67791  | -0.85053 | 4.48539  |
| C | -1.00594 | 1.56956  | 1.64978  |
| H | -0.23750 | 1.76966  | 2.39982  |
| H | -1.57022 | 2.49272  | 1.50364  |
| H | -1.69299 | 0.80992  | 2.02698  |
| C | -1.46488 | 1.16625  | -0.78216 |
| H | -2.34619 | 0.60533  | -0.46556 |
| H | -1.77061 | 2.19813  | -0.96715 |
| H | -1.08998 | 0.74855  | -1.71858 |
| C | 0.71247  | 2.18309  | -0.05896 |
| H | 1.09053  | 2.00674  | -1.06712 |
| H | 0.28450  | 3.18662  | -0.01707 |
| H | 1.54452  | 2.13438  | 0.64747  |

## Step 2, Reactant

|   |          |          |          |
|---|----------|----------|----------|
| O | -0.73220 | -1.17367 | 0.41669  |
| O | 0.98383  | -0.40213 | -0.88310 |
| C | 1.76164  | -1.60491 | -0.93713 |
| H | 2.67345  | -1.50044 | -0.34965 |
| H | 1.18251  | -2.45866 | -0.58354 |
| H | 2.01401  | -1.74359 | -1.98611 |
| C | 0.33429  | -0.15110 | 0.29796  |
| C | -0.25711 | 1.27954  | 0.26636  |
| H | -1.52587 | -1.11859 | -0.24000 |
| O | 1.17924  | -0.40968 | 1.35570  |
| H | 0.82750  | -0.08866 | 2.20971  |
| H | -1.07549 | -1.31849 | 1.42107  |

## Transition State

|   |          |          |          |
|---|----------|----------|----------|
| O | -1.10565 | -1.00164 | 0.68422  |
| O | 0.45312  | -0.38483 | -0.78085 |
| C | 1.25523  | -1.56515 | -0.92568 |
| H | 2.25395  | -1.40457 | -0.52127 |
| H | 0.78659  | -2.42040 | -0.43460 |
| H | 1.31919  | -1.74946 | -1.99710 |
| C | -0.02012 | -0.11824 | 0.51423  |
| C | -0.46647 | 1.36467  | 0.56440  |
| H | -1.28524 | -1.15052 | -1.29003 |
| O | 1.00412  | -0.41917 | 1.41399  |
| H | 0.77354  | -0.16409 | 2.32629  |
| H | -1.33690 | -1.08913 | 1.63606  |



|   |          |          |          |   |          |          |          |
|---|----------|----------|----------|---|----------|----------|----------|
| O | -2.72504 | -1.22815 | -1.12776 | O | -1.84419 | -1.50915 | -2.02760 |
| H | -3.18411 | -2.06652 | -0.98768 | H | -1.25957 | -1.86681 | -2.72278 |
| H | -3.37426 | -0.54027 | -0.93096 | H | -2.40044 | -2.23238 | -1.68079 |
| O | -1.49895 | -1.51464 | 2.73121  | O | -1.64182 | -1.28629 | 3.35066  |
| H | -0.90206 | -1.00981 | 3.32182  | H | -0.86701 | -0.87070 | 3.77004  |
| H | -1.40268 | -2.44350 | 2.97825  | H | -1.58845 | -2.21696 | 3.59652  |
| O | 0.39668  | 0.04472  | 3.98258  | O | 0.74926  | -0.06353 | 4.18811  |
| H | 0.15583  | 0.90357  | 4.35054  | H | 0.76155  | 0.80231  | 4.61314  |
| H | 1.03637  | -0.33500 | 4.59736  | H | 1.43150  | -0.58029 | 4.63308  |
| C | -1.37717 | 1.41821  | 1.30218  | C | -1.22501 | 1.63519  | 1.86849  |
| H | -1.68137 | 2.46604  | 1.34884  | H | -2.15312 | 1.06151  | 1.91988  |
| H | -2.25246 | 0.82343  | 1.02826  | H | -0.62526 | 1.41031  | 2.75415  |
| H | -1.05389 | 1.12279  | 2.30361  | H | -1.48312 | 2.69607  | 1.91112  |
| C | -0.81792 | 1.60253  | -1.12376 | C | -1.40029 | 1.66481  | -0.61358 |
| H | -1.54054 | 0.85710  | -1.46144 | H | -1.77610 | 2.68646  | -0.51802 |
| H | -1.32905 | 2.56685  | -1.07408 | H | -0.88216 | 1.58330  | -1.57096 |
| H | -0.02316 | 1.67496  | -1.86721 | H | -2.26047 | 0.99038  | -0.62162 |
| C | 0.86985  | 2.26776  | 0.59005  | C | 0.76405  | 2.27269  | 0.49022  |
| H | 1.73051  | 2.11420  | -0.06537 | H | 1.37003  | 2.05068  | -0.39136 |
| H | 0.50140  | 3.28490  | 0.43907  | H | 0.43983  | 3.31441  | 0.42605  |
| H | 1.19907  | 2.17514  | 1.62746  | H | 1.39100  | 2.16755  | 1.37834  |

Step 3, Reactant

|   |          |          |          |
|---|----------|----------|----------|
| O | -1.10450 | -0.06206 | -1.28270 |
| O | -0.75292 | 0.27042  | 0.91230  |
| C | -0.05882 | 0.56141  | 2.14548  |
| H | 0.28884  | -0.36073 | 2.60768  |
| H | 0.76909  | 1.23035  | 1.92128  |
| H | -0.78009 | 1.06581  | 2.78514  |
| C | -0.04986 | 0.05756  | -0.43334 |
| C | 0.79963  | -1.23070 | -0.43118 |
| H | -1.63951 | -0.33351 | 1.04614  |
| O | 0.61917  | 1.22232  | -0.68439 |
| H | 1.44864  | 1.34020  | -0.16967 |
| H | -1.57184 | 0.80873  | -1.32447 |
| O | -2.80144 | -1.00721 | 1.27599  |
| H | -2.62397 | -1.94252 | 1.44820  |
| H | -3.34388 | -0.98718 | 0.47492  |
| O | -2.31559 | 2.34946  | -1.31856 |
| H | -3.12570 | 2.36642  | -0.79544 |
| H | -1.71643 | 2.95680  | -0.86770 |
| O | 2.77827  | 2.13466  | 0.69751  |
| H | 3.20813  | 2.78356  | 0.12779  |
| H | 3.48051  | 1.52265  | 0.94751  |
| C | 2.13590  | -1.03985 | 0.29586  |
| H | 2.64009  | -2.00798 | 0.33400  |
| H | 2.78813  | -0.35418 | -0.24962 |
| H | 2.02965  | -0.68471 | 1.32135  |

Transition State

|   |          |          |          |
|---|----------|----------|----------|
| O | -1.66797 | -0.15930 | 1.24455  |
| O | 0.23114  | -0.51869 | -0.25478 |
| C | 1.39962  | -1.25985 | 0.11892  |
| H | 2.20943  | -0.55013 | 0.27444  |
| H | 1.22238  | -1.83626 | 1.02971  |
| H | 1.64937  | -1.93094 | -0.70321 |
| C | -0.54358 | 0.49873  | 1.05675  |
| C | -0.68418 | 1.83044  | 0.34045  |
| H | -0.47314 | -1.14553 | -0.58588 |
| O | 0.38720  | 0.47437  | 1.98861  |
| H | 0.35372  | -0.30666 | 2.59807  |
| H | -1.51972 | -1.09449 | 1.60750  |
| O | -1.64553 | -2.12978 | -1.12896 |
| H | -1.36836 | -3.05053 | -1.21406 |
| H | -2.35286 | -2.14110 | -0.47124 |
| O | -1.22030 | -2.58165 | 1.98651  |
| H | -0.47479 | -2.48156 | 2.60759  |
| H | -0.85183 | -3.00812 | 1.20198  |
| O | 0.71056  | -1.59053 | 3.67377  |
| H | 0.52093  | -1.44934 | 4.60953  |
| H | 1.64356  | -1.83400 | 3.62777  |
| C | -1.36562 | 2.77691  | 1.34496  |
| H | -2.35455 | 2.40935  | 1.62668  |
| H | -0.76161 | 2.89743  | 2.24668  |
| H | -1.48312 | 3.75574  | 0.87532  |

|   |          |          |          |   |          |         |          |
|---|----------|----------|----------|---|----------|---------|----------|
| C | 1.10716  | -1.57030 | -1.89781 | C | -1.56515 | 1.68285 | -0.90127 |
| H | 1.82092  | -2.39680 | -1.92219 | H | -1.69233 | 2.66760 | -1.35614 |
| H | 0.20893  | -1.87519 | -2.43575 | H | -1.10744 | 1.02295 | -1.64037 |
| H | 1.55453  | -0.71752 | -2.41426 | H | -2.55359 | 1.29655 | -0.64651 |
| C | 0.01502  | -2.38257 | 0.20306  | C | 0.69029  | 2.38411 | -0.03734 |
| H | -0.12452 | -2.23681 | 1.27775  | H | 1.21071  | 1.71653 | -0.72666 |
| H | -0.96445 | -2.50213 | -0.26645 | H | 0.55342  | 3.34845 | -0.53152 |
| H | 0.57482  | -3.30938 | 0.06019  | H | 1.31533  | 2.54055 | 0.84351  |

**(e) Reactant and transition state structures of the 2-water mechanism for 20 alkyl groups.**

Group C2H5

| Reactant |          |          |          | Transition State |          |          |          |
|----------|----------|----------|----------|------------------|----------|----------|----------|
| O        | -2.11805 | -0.28384 | -1.77220 | O                | 0.56295  | 0.33309  | -1.22897 |
| O        | -1.00237 | 0.55824  | 0.81904  | O                | 1.98095  | -0.76501 | 0.06461  |
| C        | -2.00499 | 1.56364  | 1.13934  | C                | 2.33362  | -1.67727 | 1.10606  |
| H        | -1.50710 | 2.50445  | 1.36306  | H                | 1.94950  | -1.33638 | 2.06918  |
| H        | -2.67834 | 1.66004  | 0.28879  | H                | 1.96016  | -2.67851 | 0.88434  |
| H        | -2.51860 | 1.17106  | 2.01034  | H                | 3.42126  | -1.69637 | 1.13686  |
| C        | -0.24135 | 0.73212  | -0.18379 | C                | 0.65001  | -0.79021 | -0.38887 |
| H        | -2.58075 | -0.66487 | -1.00327 | H                | 2.16451  | 1.10050  | -0.40305 |
| O        | -0.31469 | 1.85284  | -0.79838 | O                | 0.51058  | -1.97237 | -1.12702 |
| H        | 0.30304  | 1.91431  | -1.54964 | H                | -0.42256 | -2.12352 | -1.32640 |
| H        | -2.56052 | 0.55640  | -1.93556 | H                | 0.97667  | 0.10508  | -2.07468 |
| O        | -3.24465 | -1.43922 | 0.53941  | O                | 2.81463  | 1.84869  | -0.32301 |
| H        | -3.83371 | -0.81407 | 0.97820  | H                | 3.27648  | 1.77764  | 0.53315  |
| H        | -2.45668 | -1.45679 | 1.09605  | H                | 2.34220  | 2.70125  | -0.35409 |
| C        | 0.72358  | -0.34520 | -0.50991 | C                | -0.36608 | -0.64085 | 0.73258  |
| C        | 1.33935  | -0.24420 | -1.89787 | C                | -1.80658 | -0.53767 | 0.24213  |
| H        | 0.19113  | -1.28562 | -0.35685 | H                | -0.08817 | 0.25428  | 1.29528  |
| H        | 1.49016  | -0.28420 | 0.27188  | H                | -0.25953 | -1.49970 | 1.39770  |
| H        | 1.99679  | -1.09841 | -2.05407 | H                | -1.94350 | 0.32035  | -0.41708 |
| H        | 1.94585  | 0.65838  | -2.00713 | H                | -2.47636 | -0.42159 | 1.09519  |
| H        | 0.57003  | -0.25668 | -2.67164 | H                | -2.11974 | -1.43862 | -0.29273 |

Group C3H7

| Reactant |          |          |          | Transition State |          |          |          |
|----------|----------|----------|----------|------------------|----------|----------|----------|
| O        | -2.18420 | -0.37620 | -1.73501 | O                | 0.69768  | 0.52753  | -1.30563 |
| O        | -0.96231 | 0.50669  | 0.79009  | O                | 1.90345  | -0.76590 | 0.02182  |
| C        | -1.94052 | 1.51311  | 1.17565  | C                | 2.08200  | -1.74257 | 1.04909  |
| H        | -1.42409 | 2.44615  | 1.39014  | H                | 1.68785  | -1.38298 | 2.00132  |
| H        | -2.65431 | 1.63078  | 0.36178  | H                | 1.60106  | -2.68289 | 0.77401  |
| H        | -2.41395 | 1.10978  | 2.06418  | H                | 3.15534  | -1.89853 | 1.13726  |
| C        | -0.25173 | 0.69132  | -0.24723 | C                | 0.60088  | -0.61024 | -0.48695 |
| H        | -2.65302 | -0.68992 | -0.93954 | H                | 2.28217  | 1.11731  | -0.34475 |
| O        | -0.36534 | 1.81402  | -0.85342 | O                | 0.33816  | -1.75115 | -1.25505 |
| H        | 0.21554  | 1.88711  | -1.63270 | H                | -0.60789 | -1.80255 | -1.44340 |
| H        | -2.64386 | 0.43066  | -1.99153 | H                | 1.12963  | 0.26278  | -2.13098 |
| O        | -3.40243 | -1.34860 | 0.61075  | O                | 2.95454  | 1.83383  | -0.19331 |

|   |          |          |          |   |          |          |          |
|---|----------|----------|----------|---|----------|----------|----------|
| H | -3.97171 | -0.66772 | 0.98854  | H | 3.37748  | 1.70181  | 0.67588  |
| H | -2.67095 | -1.42254 | 1.23554  | H | 2.51023  | 2.70201  | -0.20053 |
| C | 0.71012  | -0.37231 | -0.62121 | C | -0.43593 | -0.34672 | 0.59319  |
| C | 1.26451  | -0.27722 | -2.03955 | C | -1.82414 | 0.00005  | 0.05799  |
| C | 2.17890  | -1.46178 | -2.33124 | C | -2.80960 | 0.22053  | 1.20188  |
| H | 1.63239  | -2.40332 | -2.24045 | H | -2.47514 | 1.03550  | 1.84914  |
| H | 2.58128  | -1.39705 | -3.34309 | H | -3.80117 | 0.47560  | 0.82304  |
| H | 3.01727  | -1.48573 | -1.63105 | H | -2.90245 | -0.67945 | 1.81515  |
| H | 0.20255  | -1.32333 | -0.44377 | H | -0.05824 | 0.47466  | 1.21028  |
| H | 1.51754  | -0.30059 | 0.11909  | H | -0.49822 | -1.23652 | 1.22481  |
| H | 1.83132  | 0.65201  | -2.15683 | H | -1.76576 | 0.89907  | -0.55942 |
| H | 0.43632  | -0.25655 | -2.75265 | H | -2.19717 | -0.80514 | -0.58396 |

#### Group C4H9

##### Reactant

|   |          |          |          |
|---|----------|----------|----------|
| O | -2.18646 | -0.35357 | -1.74563 |
| O | -0.97237 | 0.48999  | 0.79549  |
| C | -1.95187 | 1.49307  | 1.18665  |
| H | -1.43599 | 2.42377  | 1.41238  |
| H | -2.66200 | 1.61862  | 0.37074  |
| H | -2.42937 | 1.08135  | 2.06914  |
| C | -0.25490 | 0.68675  | -0.23494 |
| H | -2.66385 | -0.67097 | -0.95672 |
| O | -0.36443 | 1.81662  | -0.82841 |
| H | 0.22317  | 1.89936  | -1.60172 |
| H | -2.62789 | 0.46755  | -1.98863 |
| O | -3.42962 | -1.34462 | 0.57878  |
| H | -4.00018 | -0.66667 | 0.95987  |
| H | -2.70637 | -1.43178 | 1.21141  |
| C | 0.70890  | -0.37256 | -0.61564 |
| C | 1.26789  | -0.26194 | -2.03031 |
| C | 2.18429  | -1.44118 | -2.34726 |
| H | 1.62001  | -2.37178 | -2.23261 |
| H | 2.99661  | -1.46975 | -1.61430 |
| H | 0.20083  | -1.32525 | -0.44926 |
| H | 1.51289  | -0.30729 | 0.12896  |
| H | 1.84015  | 0.66673  | -2.13754 |
| H | 0.44386  | -0.23210 | -2.74997 |
| C | 2.75679  | -1.34963 | -3.75708 |
| H | 3.33785  | -0.43206 | -3.88198 |
| H | 3.41238  | -2.19555 | -3.97325 |
| H | 1.95630  | -1.34432 | -4.50158 |

##### Transition State

|   |          |          |          |
|---|----------|----------|----------|
| O | 0.66411  | 0.53173  | -1.28897 |
| O | 1.89256  | -0.75245 | 0.02730  |
| C | 2.09090  | -1.73426 | 1.04620  |
| H | 1.70095  | -1.38583 | 2.00426  |
| H | 1.61874  | -2.67826 | 0.76870  |
| H | 3.16671  | -1.87832 | 1.12423  |
| C | 0.58697  | -0.61325 | -0.47803 |
| H | 2.25108  | 1.13405  | -0.33930 |
| O | 0.34271  | -1.75304 | -1.25437 |
| H | -0.59477 | -1.79263 | -1.48475 |
| H | 1.09449  | 0.27856  | -2.11883 |
| O | 2.92211  | 1.85273  | -0.19210 |
| H | 3.34789  | 1.72408  | 0.67620  |
| H | 2.47591  | 2.71993  | -0.20024 |
| C | -0.45091 | -0.37242 | 0.60660  |
| C | -1.85321 | -0.08342 | 0.07595  |
| C | -2.84446 | 0.16506  | 1.21097  |
| H | -2.49005 | 1.00468  | 1.81792  |
| H | -2.86645 | -0.71068 | 1.86782  |
| H | -0.09595 | 0.47012  | 1.20840  |
| H | -0.47736 | -1.25485 | 1.25055  |
| H | -1.82977 | 0.78961  | -0.58249 |
| H | -2.21563 | -0.92800 | -0.52247 |
| C | -4.24834 | 0.45860  | 0.69236  |
| H | -4.94835 | 0.63467  | 1.51196  |
| H | -4.24871 | 1.34588  | 0.05328  |
| H | -4.62723 | -0.37928 | 0.10067  |

#### Group CH3

##### Reactant

|   |          |          |          |
|---|----------|----------|----------|
| O | -2.30300 | -0.49698 | -1.65550 |
| O | -0.96353 | 0.52861  | 0.74752  |
| C | -1.92585 | 1.56275  | 1.09900  |

##### Transition State

|   |         |          |          |
|---|---------|----------|----------|
| O | 0.77437 | 0.50784  | -1.35487 |
| O | 1.97646 | -0.77838 | -0.01387 |
| C | 2.13870 | -1.70245 | 1.06344  |

|   |          |          |          |   |          |          |          |
|---|----------|----------|----------|---|----------|----------|----------|
| H | -1.39760 | 2.50182  | 1.24800  | H | 1.77032  | -1.27635 | 1.99861  |
| H | -2.65785 | 1.64028  | 0.29658  | H | 1.62175  | -2.63919 | 0.84763  |
| H | -2.37966 | 1.21369  | 2.02015  | H | 3.20725  | -1.88988 | 1.14630  |
| C | -0.29552 | 0.64131  | -0.32637 | C | 0.66507  | -0.59052 | -0.48453 |
| H | -2.73482 | -0.77139 | -0.82555 | H | 2.36144  | 1.11020  | -0.38392 |
| O | -0.42738 | 1.72356  | -0.99955 | O | 0.32036  | -1.75023 | -1.18906 |
| H | 0.11306  | 1.72580  | -1.80904 | H | -0.63746 | -1.76753 | -1.31377 |
| H | -2.77013 | 0.30157  | -1.92434 | H | 1.21314  | 0.20196  | -2.16257 |
| O | -3.38546 | -1.33761 | 0.80825  | O | 3.03143  | 1.82769  | -0.23083 |
| H | -3.93856 | -0.64328 | 1.18543  | H | 3.45190  | 1.69690  | 0.63980  |
| H | -2.60760 | -1.36061 | 1.37862  | H | 2.58600  | 2.69533  | -0.24031 |
| C | 0.65110  | -0.42916 | -0.68107 | C | -0.33092 | -0.23751 | 0.59644  |
| H | 0.79126  | -0.45987 | -1.76030 | H | 0.02139  | 0.63542  | 1.14765  |
| H | 0.28948  | -1.37916 | -0.29528 | H | -0.46373 | -1.07438 | 1.28111  |
| H | 1.60486  | -0.18297 | -0.20292 | H | -1.28920 | -0.00551 | 0.12989  |

Group cyclohexane

Reactant

|   |          |          |          |
|---|----------|----------|----------|
| O | -2.40974 | -1.04974 | -1.08694 |
| O | -0.78450 | 0.87928  | 0.47403  |
| C | -1.84972 | 1.84927  | 0.68385  |
| H | -1.50882 | 2.82813  | 0.35440  |
| H | -2.72530 | 1.52152  | 0.12549  |
| H | -2.03026 | 1.83146  | 1.75332  |
| C | -0.35694 | 0.65961  | -0.70051 |
| H | -2.51787 | -1.10164 | -0.11967 |
| O | -0.80593 | 1.40029  | -1.64811 |
| H | -0.42933 | 1.15904  | -2.51354 |
| H | -2.99792 | -0.33818 | -1.36367 |
| O | -2.52307 | -1.20593 | 1.73588  |
| H | -3.04653 | -0.47951 | 2.09493  |
| H | -1.60963 | -0.96220 | 1.93120  |
| C | 0.69949  | -0.35914 | -0.90451 |
| C | 2.05722  | 0.38140  | -0.99993 |
| C | 0.71975  | -1.42240 | 0.19491  |
| H | 0.49108  | -0.81990 | -1.87706 |
| C | 3.17344  | -0.63235 | -1.25060 |
| H | 2.23324  | 0.90845  | -0.05617 |
| H | 2.01944  | 1.12323  | -1.80113 |
| C | 1.84589  | -2.42150 | -0.07178 |
| H | 0.88462  | -0.93343 | 1.16083  |
| H | -0.24796 | -1.92799 | 0.23696  |
| C | 3.19830  | -1.71495 | -0.17143 |
| H | 4.13024  | -0.10639 | -1.28875 |
| H | 3.01808  | -1.09763 | -2.23049 |
| H | 1.86281  | -3.16879 | 0.72468  |
| H | 1.64195  | -2.95181 | -1.00906 |
| H | 3.98758  | -2.43940 | -0.38650 |

Transition State

|   |          |          |          |
|---|----------|----------|----------|
| O | 0.70017  | 0.30462  | -1.47902 |
| O | 1.88705  | -0.64491 | 0.12808  |
| C | 2.07067  | -1.45000 | 1.29345  |
| H | 1.54987  | -1.02230 | 2.15289  |
| H | 1.72493  | -2.46951 | 1.11540  |
| H | 3.14132  | -1.46023 | 1.48857  |
| C | 0.62488  | -0.69329 | -0.49319 |
| H | 2.19341  | 1.15317  | -0.49487 |
| O | 0.52972  | -1.96088 | -1.08036 |
| H | -0.37828 | -2.11030 | -1.37373 |
| H | 1.22292  | -0.04811 | -2.21396 |
| O | 2.82129  | 1.91805  | -0.40160 |
| H | 3.24553  | 1.87183  | 0.47581  |
| H | 2.32723  | 2.75690  | -0.46449 |
| C | -0.52937 | -0.37284 | 0.45639  |
| C | -0.32726 | 0.98713  | 1.13660  |
| C | -1.89209 | -0.42109 | -0.24651 |
| H | -0.52036 | -1.15616 | 1.22367  |
| C | -1.45610 | 1.27109  | 2.12907  |
| H | -0.31628 | 1.76978  | 0.36889  |
| H | 0.64053  | 1.01828  | 1.64504  |
| C | -3.02122 | -0.13408 | 0.74647  |
| H | -1.91110 | 0.32626  | -1.04701 |
| H | -2.06436 | -1.39973 | -0.70541 |
| C | -2.82059 | 1.21210  | 1.44202  |
| H | -1.30403 | 2.24937  | 2.59217  |
| H | -1.42315 | 0.52548  | 2.93249  |
| H | -3.98179 | -0.15594 | 0.22566  |
| H | -3.04482 | -0.93011 | 1.50000  |
| H | -3.61942 | 1.38473  | 2.16808  |

|   |         |          |         |   |          |         |         |
|---|---------|----------|---------|---|----------|---------|---------|
| H | 3.43551 | -1.25435 | 0.79469 | H | -2.88252 | 2.01419 | 0.69674 |
|---|---------|----------|---------|---|----------|---------|---------|

Group Et2CH

Reactant

|   |          |          |          |
|---|----------|----------|----------|
| O | -2.51022 | -0.39518 | -1.72778 |
| O | -0.98728 | 0.55392  | 0.74201  |
| C | -1.96093 | 1.59468  | 1.04142  |
| H | -1.43735 | 2.54073  | 1.16050  |
| H | -2.68332 | 1.63880  | 0.22837  |
| H | -2.42410 | 1.27784  | 1.96966  |
| C | -0.30755 | 0.61919  | -0.32851 |
| H | -2.82236 | -0.71564 | -0.86186 |
| O | -0.46373 | 1.65582  | -1.06646 |
| H | 0.08039  | 1.62810  | -1.87360 |
| H | -2.87316 | 0.49345  | -1.80971 |
| O | -3.22590 | -1.43466 | 0.79788  |
| H | -3.74013 | -0.80157 | 1.31273  |
| H | -2.35534 | -1.43098 | 1.21493  |
| C | 0.68719  | -0.45280 | -0.59932 |
| C | 1.99090  | -0.08096 | 0.15360  |
| C | 2.51450  | 1.32241  | -0.13443 |
| H | 2.60530  | 1.49386  | -1.21080 |
| H | 1.86158  | 2.09531  | 0.27979  |
| H | 3.50120  | 1.45192  | 0.31267  |
| C | 0.14683  | -1.82848 | -0.18157 |
| H | -0.02063 | -1.82915 | 0.89958  |
| H | -0.82140 | -1.98585 | -0.66192 |
| H | 0.88410  | -0.43240 | -1.67653 |
| H | 2.73524  | -0.81849 | -0.14891 |
| C | 1.09780  | -2.95759 | -0.56572 |
| H | 2.02976  | -2.91606 | 0.00024  |
| H | 0.62999  | -3.92285 | -0.36433 |
| H | 1.34134  | -2.91623 | -1.63068 |
| H | 1.81279  | -0.21345 | 1.22474  |

Transition State

|   |          |          |          |
|---|----------|----------|----------|
| O | 0.55773  | 0.22216  | -1.32196 |
| O | 1.96643  | -0.52518 | 0.22191  |
| C | 2.71233  | -1.66924 | 0.64510  |
| H | 2.14240  | -2.28477 | 1.34061  |
| H | 3.02031  | -2.27038 | -0.21099 |
| H | 3.59331  | -1.27410 | 1.14863  |
| C | 0.64408  | -0.69181 | -0.24907 |
| H | 2.24294  | 1.02398  | -0.90860 |
| O | 0.51286  | -2.00090 | -0.70672 |
| H | -0.42421 | -2.22709 | -0.76853 |
| H | 0.87739  | -0.23154 | -2.11610 |
| O | 2.91797  | 1.73528  | -1.09181 |
| H | 3.39454  | 1.94308  | -0.26608 |
| H | 2.46252  | 2.53989  | -1.40243 |
| C | -0.39219 | -0.28587 | 0.81053  |
| C | -1.83553 | -0.63257 | 0.40839  |
| C | -2.33005 | -0.12004 | -0.94403 |
| H | -2.16185 | 0.95525  | -1.04115 |
| H | -1.83596 | -0.61218 | -1.78374 |
| H | -3.40294 | -0.30404 | -1.03437 |
| C | -0.04654 | -0.90157 | 2.17446  |
| H | -0.05143 | -1.99403 | 2.08684  |
| H | 0.96915  | -0.60684 | 2.44696  |
| H | -0.30367 | 0.80453  | 0.89004  |
| C | -0.99362 | -0.47522 | 3.29487  |
| H | -1.10382 | 0.61312  | 3.31832  |
| H | -1.98724 | -0.91264 | 3.18475  |
| H | -0.60016 | -0.79320 | 4.26259  |
| H | -1.97290 | -1.72071 | 0.46920  |
| H | -2.48383 | -0.21678 | 1.18192  |

Group EtMe2C

Reactant

|   |          |          |          |
|---|----------|----------|----------|
| O | 2.01278  | -0.71611 | -1.76608 |
| O | 0.37730  | 0.73978  | 0.30726  |
| C | 1.50889  | 0.97502  | 1.19276  |
| H | 1.27344  | 0.58051  | 2.17888  |
| H | 2.38696  | 0.49170  | 0.76768  |
| H | 1.62045  | 2.05376  | 1.21370  |
| C | -0.00346 | -0.44938 | 0.07287  |
| H | 2.62498  | -0.98179 | -1.07096 |
| O | 0.58813  | -1.39220 | 0.70763  |
| H | 0.25363  | -2.27593 | 0.47089  |
| H | 2.06187  | 0.25722  | -1.78741 |

Transition State

|   |          |          |          |
|---|----------|----------|----------|
| O | -1.05123 | 0.41144  | 1.32856  |
| O | -1.43824 | -0.94544 | -0.40231 |
| C | -1.49911 | -2.32300 | -0.78044 |
| H | -2.23184 | -2.37233 | -1.58443 |
| H | -0.53702 | -2.68268 | -1.14587 |
| H | -1.83056 | -2.94263 | 0.05330  |
| C | -0.41503 | -0.50846 | 0.46716  |
| H | -2.55262 | 0.60515  | 0.12127  |
| O | 0.02138  | -1.60963 | 1.19853  |
| H | 0.86530  | -1.40185 | 1.61884  |
| H | -1.50667 | -0.10615 | 2.00846  |

|   |          |          |          |   |          |          |          |
|---|----------|----------|----------|---|----------|----------|----------|
| O | 1.97448  | 2.10439  | -1.85746 | O | -3.23002 | 1.25172  | -0.21347 |
| H | 1.09954  | 2.28827  | -1.49371 | H | -3.42652 | 1.04565  | -1.14711 |
| H | 2.58617  | 2.46321  | -1.20347 | H | -2.83063 | 2.14227  | -0.17479 |
| C | -1.18779 | -0.64171 | -0.82633 | C | 0.69457  | 0.24941  | -0.30229 |
| C | -1.26279 | -2.08288 | -1.33404 | C | 1.32264  | -0.63058 | -1.40475 |
| H | -2.11055 | -2.15579 | -2.01668 | H | 1.94606  | 0.04400  | -2.00055 |
| H | -0.35636 | -2.35188 | -1.88125 | C | 0.06135  | 1.46528  | -0.99642 |
| C | -2.43217 | -0.27988 | 0.03863  | H | 0.84076  | 2.01401  | -1.52991 |
| H | -2.41553 | 0.79833  | 0.21660  | H | -0.39984 | 2.14733  | -0.27943 |
| C | -2.55735 | -1.02227 | 1.36520  | C | 2.18937  | -1.81427 | -0.97369 |
| H | -2.55622 | -2.10573 | 1.23040  | H | 3.01154  | -1.49340 | -0.32937 |
| H | -1.74831 | -0.76237 | 2.05393  | H | 1.62384  | -2.58018 | -0.44205 |
| H | -3.49664 | -0.74916 | 1.84902  | H | 2.63127  | -2.28085 | -1.85734 |
| C | -1.10366 | 0.33215  | -2.00810 | H | -0.69374 | 1.15759  | -1.72394 |
| H | -0.23994 | 0.11249  | -2.63749 | H | 0.52729  | -0.97144 | -2.07513 |
| H | -2.00996 | 0.21277  | -2.60459 | C | 1.76645  | 0.75085  | 0.67290  |
| H | -1.04989 | 1.36732  | -1.66829 | H | 1.34706  | 1.46877  | 1.38006  |
| H | -1.42776 | -2.81021 | -0.53492 | H | 2.24734  | -0.04959 | 1.24172  |
| H | -3.29439 | -0.49367 | -0.59868 | H | 2.55401  | 1.25234  | 0.10437  |

Group H

Reactant

|   |          |          |          |
|---|----------|----------|----------|
| O | -2.16137 | -0.58541 | -1.63963 |
| O | -0.92205 | 0.55304  | 0.72883  |
| C | -1.85899 | 1.56568  | 1.20675  |
| H | -1.32477 | 2.50531  | 1.32739  |
| H | -2.66594 | 1.65388  | 0.48118  |
| H | -2.21373 | 1.18405  | 2.15745  |
| C | -0.37441 | 0.71119  | -0.39459 |
| H | -2.67623 | -0.82496 | -0.84633 |
| O | -0.54140 | 1.79080  | -1.04691 |
| H | -0.05185 | 1.78511  | -1.88945 |
| H | -2.70831 | 0.05366  | -2.10928 |
| O | -3.45495 | -1.27237 | 0.75559  |
| H | -3.98297 | -0.52856 | 1.06915  |
| H | -2.72619 | -1.33127 | 1.38520  |
| H | 0.29429  | -0.07077 | -0.73873 |

Transition State

|   |          |          |          |
|---|----------|----------|----------|
| O | 0.80509  | 0.60870  | -1.23962 |
| O | 2.03728  | -0.81312 | -0.04271 |
| C | 2.11740  | -1.78045 | 1.00571  |
| H | 1.48843  | -1.47660 | 1.84691  |
| H | 1.80768  | -2.76292 | 0.64600  |
| H | 3.15826  | -1.81587 | 1.31880  |
| C | 0.73650  | -0.56126 | -0.47589 |
| H | 2.48327  | 1.11156  | -0.39659 |
| O | 0.30763  | -1.65330 | -1.22788 |
| H | -0.65646 | -1.63369 | -1.28328 |
| H | 1.14441  | 0.37546  | -2.11728 |
| O | 3.18011  | 1.80610  | -0.26487 |
| H | 3.61838  | 1.66749  | 0.59589  |
| H | 2.75517  | 2.68427  | -0.26689 |
| H | 0.07019  | -0.36447 | 0.36806  |

Group iBu2CH

Reactant

|   |         |          |          |
|---|---------|----------|----------|
| O | 3.40675 | -1.34743 | -0.05905 |
| O | 0.70075 | -2.12532 | -1.12992 |
| C | 1.21173 | -2.75589 | -2.33796 |
| H | 0.64160 | -2.38882 | -3.18947 |
| H | 2.27053 | -2.52262 | -2.43842 |
| H | 1.05077 | -3.81723 | -2.18205 |
| C | 0.73420 | -0.85935 | -1.02138 |
| H | 3.16007 | -2.28956 | -0.02154 |

Transition State

|   |         |          |          |
|---|---------|----------|----------|
| O | 0.91994 | -0.66459 | -1.49441 |
| O | 1.08954 | -2.01981 | 0.32595  |
| C | 1.38932 | -3.30136 | -0.23594 |
| H | 0.54091 | -3.97723 | -0.12534 |
| H | 1.66747 | -3.22246 | -1.28986 |
| H | 2.23736 | -3.68247 | 0.33002  |
| C | 0.20530 | -1.20756 | -0.39787 |
| H | 2.51880 | -0.79645 | -0.31148 |

|   |          |          |          |   |          |          |          |
|---|----------|----------|----------|---|----------|----------|----------|
| O | 1.23157  | -0.20935 | -2.00794 | O | -0.83527 | -2.01437 | -0.86083 |
| H | 1.22676  | 0.75600  | -1.87867 | H | -1.46246 | -1.46808 | -1.35252 |
| H | 3.58899  | -1.17135 | -0.98841 | H | 0.92819  | -1.31095 | -2.21486 |
| O | 2.64779  | -4.04480 | 0.24846  | O | 3.36345  | -0.34524 | -0.05113 |
| H | 2.79228  | -4.55717 | -0.55566 | H | 3.50686  | -0.48643 | 0.90439  |
| H | 1.68872  | -4.02663 | 0.35161  | H | 3.26416  | 0.61268  | -0.21248 |
| C | 0.20441  | -0.25996 | 0.24061  | C | -0.21457 | -0.02403 | 0.49580  |
| C | 0.06588  | 1.27466  | 0.23962  | C | -1.53324 | 0.65278  | 0.06719  |
| H | -0.30002 | 1.62562  | -0.73358 | H | -2.33800 | -0.08990 | 0.03298  |
| C | -1.10781 | -0.96520 | 0.66280  | C | -0.25751 | -0.33623 | 2.00787  |
| H | -0.96131 | -2.04877 | 0.64887  | H | 0.70216  | -0.75305 | 2.32725  |
| C | 1.28267  | 2.10661  | 0.68599  | C | -1.59648 | 1.51017  | -1.21534 |
| H | 0.90015  | 3.12780  | 0.78410  | H | -2.49181 | 2.12792  | -1.08281 |
| C | -2.35009 | -0.60733 | -0.16092 | C | -1.38751 | -1.21933 | 2.56525  |
| H | -2.52373 | 0.47085  | -0.07721 | H | -2.33000 | -0.93771 | 2.08336  |
| H | 0.96309  | -0.56443 | 0.97361  | H | 0.59563  | 0.70322  | 0.37467  |
| C | 2.43042  | 2.14958  | -0.32195 | C | -0.41003 | 2.46417  | -1.34824 |
| H | 2.10094  | 2.52261  | -1.29867 | H | 0.51250  | 1.92473  | -1.57686 |
| H | 3.21242  | 2.82747  | 0.02902  | H | -0.58602 | 3.17954  | -2.15593 |
| H | 2.89436  | 1.16570  | -0.44789 | H | -0.25221 | 3.02969  | -0.42502 |
| C | -2.20250 | -0.95424 | -1.64284 | C | -1.15982 | -2.71727 | 2.34927  |
| H | -1.95974 | -2.01394 | -1.77386 | H | -0.21197 | -3.02451 | 2.80477  |
| H | -3.13858 | -0.75586 | -2.17064 | H | -1.96080 | -3.29109 | 2.82424  |
| H | -1.43058 | -0.35712 | -2.13917 | H | -1.12972 | -2.98828 | 1.29456  |
| H | -1.27692 | -0.67878 | 1.70399  | H | -1.78862 | 1.31879  | 0.89776  |
| H | -0.74003 | 1.49373  | 0.94422  | H | -0.33952 | 0.64356  | 2.49032  |
| C | 1.79688  | 1.66927  | 2.05772  | C | -1.82018 | 0.71820  | -2.50650 |
| H | 0.97917  | 1.56622  | 2.77659  | H | -2.03861 | 1.40105  | -3.33215 |
| H | 2.32450  | 0.71258  | 1.99905  | H | -0.94120 | 0.13617  | -2.79276 |
| H | 2.50313  | 2.40552  | 2.44884  | H | -2.67577 | 0.04097  | -2.40923 |
| C | -3.55888 | -1.33092 | 0.43188  | C | -1.52886 | -0.94554 | 4.06484  |
| H | -3.43289 | -2.41511 | 0.34662  | H | -0.59156 | -1.17759 | 4.58250  |
| H | -3.68740 | -1.08718 | 1.48958  | H | -1.76856 | 0.10331  | 4.25808  |
| H | -4.47501 | -1.05534 | -0.09593 | H | -2.31578 | -1.56312 | 4.50565  |

Group iBut

Reactant

|   |          |          |          |
|---|----------|----------|----------|
| O | -2.26215 | -0.25637 | -0.71004 |
| O | 0.53805  | -0.04003 | 0.20901  |
| C | 0.88150  | 1.11434  | -0.60957 |
| H | 1.79629  | 0.89795  | -1.15728 |
| H | 0.05102  | 1.31902  | -1.28341 |
| H | 1.02631  | 1.92086  | 0.10113  |
| C | 0.28075  | -1.14930 | -0.35301 |
| H | -2.09839 | 0.44707  | -0.05527 |
| O | 0.42898  | -1.22117 | -1.62521 |
| H | 0.21476  | -2.10326 | -1.97988 |
| H | -2.03034 | 0.13997  | -1.55716 |

Transition State

|   |          |          |          |
|---|----------|----------|----------|
| O | -0.18433 | -1.64292 | -0.04939 |
| O | 0.16704  | 0.47938  | -0.56338 |
| C | 0.87001  | 1.71900  | -0.47143 |
| H | 0.84997  | 2.10471  | 0.54976  |
| H | 1.90176  | 1.60217  | -0.80780 |
| H | 0.35150  | 2.41288  | -1.13004 |
| C | 0.79380  | -0.63834 | 0.02393  |
| H | -1.59990 | -0.31126 | -0.08226 |
| O | 1.88514  | -0.94866 | -0.79760 |
| H | 2.53417  | -1.46143 | -0.30001 |
| H | -0.24378 | -1.92959 | -0.97296 |

|   |          |          |          |   |          |          |         |
|---|----------|----------|----------|---|----------|----------|---------|
| O | -1.72985 | 1.68538  | 1.26398  | O | -2.56540 | -0.11911 | 0.04897 |
| H | -0.98035 | 1.30573  | 1.73832  | H | -2.68795 | 0.83924  | 0.18435 |
| H | -1.37188 | 2.47788  | 0.84688  | H | -2.88195 | -0.59559 | 0.83940 |
| C | -0.07077 | -2.30864 | 0.49171  | C | 1.15640  | -0.40549 | 1.48711 |
| H | -0.93508 | -2.79979 | 0.03814  | H | 0.34866  | 0.19073  | 1.92235 |
| H | -0.33390 | -1.93902 | 1.48349  | H | 2.06446  | 0.20578  | 1.51069 |
| C | 1.11675  | -3.29879 | 0.57490  | C | 1.35818  | -1.66089 | 2.34591 |
| H | 1.32894  | -3.65249 | -0.43929 | H | 0.40339  | -2.19202 | 2.39818 |
| C | 2.36210  | -2.62055 | 1.13865  | C | 2.41079  | -2.61973 | 1.78874 |
| H | 3.17002  | -3.34767 | 1.24359  | H | 3.35860  | -2.09717 | 1.61071 |
| H | 2.72106  | -1.81532 | 0.49075  | H | 2.60835  | -3.41989 | 2.50599 |
| H | 2.15247  | -2.19778 | 2.12601  | H | 2.08754  | -3.09663 | 0.85902 |
| C | 0.69210  | -4.48483 | 1.43425  | C | 1.74369  | -1.22242 | 3.75847 |
| H | -0.19609 | -4.97261 | 1.02642  | H | 2.71328  | -0.71435 | 3.74859 |
| H | 1.49774  | -5.22040 | 1.48408  | H | 1.00496  | -0.53405 | 4.17694 |
| H | 0.46727  | -4.15538 | 2.45287  | H | 1.82165  | -2.08584 | 4.42332 |

Group iPrEtCH

Reactant

|   |          |          |          |
|---|----------|----------|----------|
| O | -2.48064 | -0.35211 | -1.75476 |
| O | -1.01328 | 0.53232  | 0.78173  |
| C | -1.98480 | 1.57291  | 1.08916  |
| H | -1.45647 | 2.51113  | 1.24412  |
| H | -2.68965 | 1.64502  | 0.26290  |
| H | -2.46913 | 1.23562  | 1.99918  |
| C | -0.30792 | 0.62154  | -0.27031 |
| H | -2.79783 | -0.71398 | -0.90699 |
| O | -0.44472 | 1.67915  | -0.98378 |
| H | 0.10804  | 1.66345  | -1.78518 |
| H | -2.84944 | 0.53696  | -1.79624 |
| O | -3.27769 | -1.44343 | 0.72185  |
| H | -3.82031 | -0.79523 | 1.18636  |
| H | -2.44043 | -1.44383 | 1.20195  |
| C | 0.68098  | -0.45060 | -0.56084 |
| C | 2.03454  | -0.09346 | 0.13851  |
| C | 2.51866  | 1.31024  | -0.22249 |
| H | 2.48486  | 1.48340  | -1.30212 |
| H | 1.91529  | 2.07977  | 0.26971  |
| H | 3.55038  | 1.44002  | 0.10950  |
| C | 1.99327  | -0.27725 | 1.65315  |
| H | 1.26245  | 0.39223  | 2.11602  |
| H | 1.75199  | -1.30263 | 1.93905  |
| H | 2.97380  | -0.03550 | 2.06982  |
| C | 0.12789  | -1.83162 | -0.17746 |
| H | -0.13463 | -1.84274 | 0.88312  |
| H | -0.79584 | -1.99593 | -0.73668 |
| H | 0.85869  | -0.41387 | -1.64096 |
| H | 2.74192  | -0.81226 | -0.28263 |

Transition State

|   |          |          |          |
|---|----------|----------|----------|
| O | 0.62288  | 0.14697  | -1.30827 |
| O | 2.00960  | -0.52370 | 0.28994  |
| C | 2.80748  | -1.61819 | 0.74853  |
| H | 2.24277  | -2.28001 | 1.40459  |
| H | 3.20621  | -2.18622 | -0.09253 |
| H | 3.62814  | -1.16959 | 1.30618  |
| C | 0.72540  | -0.77177 | -0.24531 |
| H | 2.05624  | 1.21867  | -0.60396 |
| O | 0.71933  | -2.08366 | -0.72051 |
| H | -0.14419 | -2.27107 | -1.10929 |
| H | 1.13753  | -0.20995 | -2.04797 |
| O | 2.52239  | 2.09772  | -0.58382 |
| H | 2.98572  | 2.18935  | 0.26975  |
| H | 1.85947  | 2.80974  | -0.66330 |
| C | -0.37630 | -0.43833 | 0.77812  |
| C | -1.83214 | -0.77051 | 0.35289  |
| C | -2.25371 | -0.19527 | -1.00114 |
| H | -1.77279 | -0.71842 | -1.83231 |
| H | -3.33473 | -0.30640 | -1.12011 |
| H | -2.00784 | 0.86580  | -1.08262 |
| C | -2.22293 | -2.25268 | 0.43284  |
| H | -1.81325 | -2.84949 | -0.38741 |
| H | -1.91685 | -2.71931 | 1.37065  |
| H | -3.31044 | -2.33640 | 0.36053  |
| C | -0.03508 | -1.02405 | 2.15830  |
| H | 0.05535  | -2.11283 | 2.09205  |
| H | 0.94353  | -0.64643 | 2.46164  |
| H | -0.32602 | 0.65461  | 0.86882  |
| C | -1.04803 | -0.65567 | 3.24083  |



|   |         |          |          |   |          |          |         |
|---|---------|----------|----------|---|----------|----------|---------|
| C | 1.11957 | -2.94899 | -0.48350 | H | -1.21866 | 0.42495  | 3.26105 |
| H | 1.99751 | -2.90109 | 0.16401  | H | -2.01270 | -1.14486 | 3.09159 |
| H | 0.64542 | -3.92000 | -0.33043 | H | -0.67521 | -0.95401 | 4.22294 |
| H | 1.45813 | -2.89798 | -1.52187 | H | -2.43959 | -0.25507 | 1.10276 |

Group iPr

| Reactant |          |          |          | Transition State |          |          |          |
|----------|----------|----------|----------|------------------|----------|----------|----------|
| O        | -2.59132 | -1.00934 | -1.03497 | O                | -0.03810 | -0.29241 | -1.57166 |
| O        | -0.81558 | 0.83812  | 0.39601  | O                | -0.88930 | 0.91221  | 0.08537  |
| C        | -1.82328 | 1.84926  | 0.68024  | C                | -1.54917 | 1.96568  | -0.63060 |
| H        | -1.45134 | 2.82058  | 0.36205  | H                | -1.03258 | 2.91316  | -0.47845 |
| H        | -2.73757 | 1.58021  | 0.15326  | H                | -1.60841 | 1.73907  | -1.69665 |
| H        | -1.95698 | 1.80967  | 1.75592  | H                | -2.55267 | 2.02376  | -0.21334 |
| C        | -0.47264 | 0.62002  | -0.80771 | C                | 0.33265  | 0.47717  | -0.45405 |
| H        | -2.68546 | -1.04252 | -0.06514 | H                | -1.77161 | -0.68519 | -0.66278 |
| O        | -0.95250 | 1.39125  | -1.71073 | O                | 1.10415  | 1.53660  | -0.94076 |
| H        | -0.64589 | 1.16234  | -2.60666 | H                | 1.47262  | 2.03352  | -0.19759 |
| H        | -3.18071 | -0.30013 | -1.31460 | H                | 0.74295  | -0.67126 | -1.99564 |
| O        | -2.67461 | -1.11703 | 1.77897  | O                | -2.62947 | -1.18061 | -0.62938 |
| H        | -3.17755 | -0.36843 | 2.12131  | H                | -2.86326 | -1.33355 | 0.30601  |
| H        | -1.75683 | -0.90304 | 1.98647  | H                | -2.52666 | -2.04286 | -1.07508 |
| C        | 0.53604  | -0.44763 | -1.05516 | C                | 1.03730  | -0.35457 | 0.62317  |
| C        | 0.53305  | -0.93907 | -2.49813 | H                | 0.31509  | -1.13028 | 0.89769  |
| C        | 1.90927  | 0.11823  | -0.64532 | C                | 1.36010  | 0.48211  | 1.86070  |
| H        | 2.17385  | 0.96924  | -1.27643 | H                | 1.75238  | -0.16868 | 2.64437  |
| H        | 1.91588  | 0.42975  | 0.39936  | H                | 2.13269  | 1.22788  | 1.64766  |
| H        | 2.65519  | -0.66466 | -0.78494 | H                | 0.47942  | 0.99311  | 2.25151  |
| H        | 0.26548  | -1.25628 | -0.37234 | C                | 2.30308  | -1.01403 | 0.07900  |
| H        | -0.45835 | -1.26942 | -2.81189 | H                | 2.77336  | -1.60250 | 0.86893  |
| H        | 1.21854  | -1.78320 | -2.57571 | H                | 2.09979  | -1.69072 | -0.75407 |
| H        | 0.89241  | -0.16490 | -3.18351 | H                | 3.02160  | -0.25940 | -0.25113 |

Group Pr2CH

| Reactant |          |          |          | Transition State |          |          |          |
|----------|----------|----------|----------|------------------|----------|----------|----------|
| O        | -2.50977 | -0.39013 | -1.73801 | O                | 0.53335  | -0.02341 | -1.49878 |
| O        | -0.98507 | 0.55501  | 0.74066  | O                | 2.05275  | -0.40734 | 0.07176  |
| C        | -1.95716 | 1.59659  | 1.04238  | C                | 2.90116  | -1.40693 | 0.64262  |
| H        | -1.43208 | 2.54175  | 1.16221  | H                | 2.40112  | -1.94679 | 1.44616  |
| H        | -2.68040 | 1.64301  | 0.23022  | H                | 3.23843  | -2.11062 | -0.11913 |
| H        | -2.41977 | 1.27910  | 1.97068  | H                | 3.75772  | -0.86878 | 1.04582  |
| C        | -0.30535 | 0.62121  | -0.32983 | C                | 0.73320  | -0.74739 | -0.30360 |
| H        | -2.81719 | -0.71845 | -0.87336 | H                | 2.15400  | 0.96926  | -1.29940 |
| O        | -0.46337 | 1.65748  | -1.06808 | O                | 0.69778  | -2.11910 | -0.54597 |
| H        | 0.08454  | 1.63200  | -1.87279 | H                | -0.21831 | -2.42564 | -0.53587 |
| H        | -2.87007 | 0.50060  | -1.80788 | H                | 0.86665  | -0.56652 | -2.22865 |
| O        | -3.21505 | -1.44234 | 0.78566  | O                | 2.74829  | 1.69538  | -1.63464 |
| H        | -3.72956 | -0.80934 | 1.30039  | H                | 3.28720  | 2.03502  | -0.89596 |
| H        | -2.34362 | -1.43592 | 1.20092  | H                | 2.20384  | 2.42298  | -1.98855 |

|   |          |          |          |   |          |          |          |
|---|----------|----------|----------|---|----------|----------|----------|
| C | 0.68825  | -0.45187 | -0.60292 | C | -0.29752 | -0.25757 | 0.72590  |
| C | 1.99361  | -0.08303 | 0.14762  | C | -1.71884 | -0.77492 | 0.44909  |
| C | 2.51913  | 1.32688  | -0.11461 | C | -2.31035 | -0.54369 | -0.94313 |
| H | 2.55531  | 1.50595  | -1.19510 | H | -2.20328 | 0.51152  | -1.21314 |
| H | 1.83268  | 2.06916  | 0.30671  | H | -1.76036 | -1.11458 | -1.69616 |
| C | 0.14433  | -1.82555 | -0.18531 | C | 0.14200  | -0.61552 | 2.15259  |
| H | -0.01772 | -1.83166 | 0.89792  | H | 0.22410  | -1.70575 | 2.24560  |
| H | -0.82793 | -1.98187 | -0.66144 | H | 1.13935  | -0.20362 | 2.33183  |
| H | 0.88192  | -0.43056 | -1.68053 | H | -0.29641 | 0.83467  | 0.62712  |
| H | 2.74497  | -0.80958 | -0.16938 | C | -0.78954 | -0.08925 | 3.24515  |
| C | 1.07759  | -2.97111 | -0.57124 | H | -0.99912 | 0.97069  | 3.06104  |
| H | 2.02004  | -2.88866 | -0.02414 | H | -1.74919 | -0.61087 | 3.21017  |
| H | 1.31882  | -2.89655 | -1.63683 | H | -1.76585 | -1.84615 | 0.69328  |
| H | 1.82590  | -0.23028 | 1.21976  | H | -2.37929 | -0.28631 | 1.17031  |
| C | 3.90406  | 1.52214  | 0.49338  | C | -3.78267 | -0.94416 | -0.98108 |
| H | 4.62184  | 0.82359  | 0.05586  | H | -4.36677 | -0.35255 | -0.27079 |
| H | 4.27121  | 2.53612  | 0.32332  | H | -4.21069 | -0.79627 | -1.97503 |
| H | 3.88087  | 1.34820  | 1.57250  | H | -3.90518 | -1.99846 | -0.71674 |
| C | 0.43764  | -4.32446 | -0.27682 | C | -0.17585 | -0.26213 | 4.63167  |
| H | -0.48836 | -4.44957 | -0.84417 | H | -0.85032 | 0.09257  | 5.41417  |
| H | 1.10842  | -5.14518 | -0.53911 | H | 0.04296  | -1.31536 | 4.82953  |
| H | 0.19465  | -4.41501 | 0.78547  | H | 0.76145  | 0.29450  | 4.71610  |

Group PrEtCH

Reactant

|   |          |          |          |
|---|----------|----------|----------|
| O | -2.66714 | 0.91702  | 1.16399  |
| O | -0.92314 | -1.39276 | -0.19312 |
| C | -1.67598 | -2.25325 | 0.71180  |
| H | -0.97998 | -2.93267 | 1.19931  |
| H | -2.20085 | -1.63336 | 1.43470  |
| H | -2.36588 | -2.78703 | 0.06698  |
| C | -0.04374 | -0.59999 | 0.26747  |
| H | -2.95601 | 0.47309  | 0.34635  |
| O | 0.15371  | -0.61191 | 1.53296  |
| H | 0.85083  | 0.00623  | 1.81772  |
| H | -3.14044 | 0.46497  | 1.87024  |
| O | -3.42736 | -0.27831 | -1.28319 |
| H | -2.55198 | -0.45262 | -1.65029 |
| H | -3.79527 | -1.15494 | -1.11934 |
| C | 0.66212  | 0.28511  | -0.70289 |
| C | -0.11570 | 1.62481  | -0.81426 |
| H | 0.23795  | 2.08988  | -1.73715 |
| H | -1.17676 | 1.40343  | -0.95625 |
| C | 2.14401  | 0.46303  | -0.36499 |
| H | 2.54412  | 1.18535  | -1.08326 |
| H | 2.27073  | 0.92173  | 0.62262  |
| C | 0.08492  | 2.58461  | 0.35485  |
| H | -0.57080 | 3.44916  | 0.23472  |

Transition State

|   |          |          |          |
|---|----------|----------|----------|
| O | -0.16893 | -1.39607 | 0.06077  |
| O | 0.33666  | 0.77510  | 0.11631  |
| C | 1.17643  | 1.77576  | -0.46340 |
| H | 2.10907  | 1.88992  | 0.09100  |
| H | 1.39537  | 1.54617  | -1.50655 |
| H | 0.60759  | 2.70282  | -0.40705 |
| C | 0.86894  | -0.50648 | 0.40428  |
| H | -1.46250 | 0.08180  | 0.01047  |
| O | 1.96993  | -0.70217 | -0.42650 |
| H | 2.59411  | -1.31099 | -0.01393 |
| H | -0.15955 | -1.49281 | -0.90320 |
| O | -2.39336 | 0.43113  | -0.02177 |
| H | -2.41318 | 1.30030  | 0.42055  |
| H | -2.99262 | -0.17827 | 0.44759  |
| C | 1.13227  | -0.65626 | 1.90842  |
| C | 1.36538  | -2.10946 | 2.35819  |
| H | 0.48142  | -2.70913 | 2.13250  |
| H | 1.44827  | -2.07397 | 3.44810  |
| C | 2.24686  | 0.29248  | 2.39076  |
| H | 2.99050  | 0.44576  | 1.60101  |
| H | 2.78374  | -0.19495 | 3.21141  |
| C | 2.60736  | -2.80174 | 1.79419  |
| H | 2.82246  | -3.71137 | 2.35803  |

|   |          |          |          |   |         |          |         |
|---|----------|----------|----------|---|---------|----------|---------|
| H | -0.15326 | 2.12073  | 1.31543  | H | 2.46915 | -3.10849 | 0.75313 |
| H | 1.11336  | 2.94776  | 0.39686  | H | 3.49385 | -2.16214 | 1.85760 |
| C | 2.93780  | -0.83905 | -0.43887 | C | 1.73911 | 1.64577  | 2.89331 |
| H | 2.52618  | -1.56435 | 0.27243  | H | 1.09430 | 2.11167  | 2.14334 |
| H | 2.81790  | -1.27284 | -1.43640 | H | 1.11357 | 1.47660  | 3.77618 |
| H | 0.56660  | -0.22989 | -1.66159 | H | 0.19102 | -0.33753 | 2.37049 |
| C | 4.41629  | -0.61450 | -0.14132 | C | 2.88615 | 2.58811  | 3.24196 |
| H | 4.97935  | -1.54800 | -0.20051 | H | 3.49073 | 2.80524  | 2.35642 |
| H | 4.85201  | 0.08866  | -0.85611 | H | 2.51913 | 3.53716  | 3.63909 |
| H | 4.55242  | -0.20100 | 0.86151  | H | 3.54403 | 2.14095  | 3.99269 |

Group PrMeCH

Reactant

|   |          |          |          |
|---|----------|----------|----------|
| O | -2.75819 | 0.38971  | 0.95359  |
| O | -0.59080 | -1.53880 | 0.41352  |
| C | -0.91998 | -2.44966 | 1.50041  |
| H | -0.02537 | -2.63386 | 2.09115  |
| H | -1.70914 | -1.99862 | 2.10014  |
| H | -1.26144 | -3.35320 | 1.00661  |
| C | -0.17771 | -0.36921 | 0.67870  |
| H | -3.03444 | -0.40324 | 0.45826  |
| O | 0.03998  | -0.07608 | 1.90857  |
| H | 0.35966  | 0.83771  | 2.01694  |
| H | -2.80003 | 0.12763  | 1.87988  |
| O | -3.40690 | -1.89104 | -0.59205 |
| H | -2.58239 | -1.99570 | -1.08288 |
| H | -3.44909 | -2.67095 | -0.02584 |
| C | 0.13293  | 0.55752  | -0.44210 |
| C | 1.65912  | 0.49722  | -0.65810 |
| H | 1.94464  | 1.26197  | -1.37912 |
| H | 2.20083  | 0.68630  | 0.27007  |
| C | -0.66824 | 0.21835  | -1.70063 |
| H | -0.36518 | -0.76841 | -2.06625 |
| H | -1.72932 | 0.15836  | -1.43987 |
| C | -0.48590 | 1.25737  | -2.80478 |
| H | -0.71329 | 2.25082  | -2.40389 |
| H | 0.55665  | 1.27752  | -3.13283 |
| H | -0.13326 | 1.55750  | -0.08235 |
| C | -1.38756 | 0.96144  | -3.99909 |
| H | -1.25256 | 1.70167  | -4.79043 |
| H | -1.16503 | -0.02364 | -4.41821 |
| H | -2.44022 | 0.97017  | -3.70420 |
| H | 1.94575  | -0.48209 | -1.04692 |

Transition State

|   |          |          |          |
|---|----------|----------|----------|
| O | -0.22544 | -1.50842 | 0.23364  |
| O | 0.14635  | 0.57219  | -0.38513 |
| C | 0.86401  | 1.80374  | -0.48255 |
| H | 0.74557  | 2.39259  | 0.42833  |
| H | 1.92150  | 1.62335  | -0.68004 |
| H | 0.42880  | 2.34439  | -1.32132 |
| C | 0.76675  | -0.50825 | 0.26695  |
| H | -1.62317 | -0.19521 | 0.03657  |
| O | 1.85565  | -0.88369 | -0.52522 |
| H | 2.44542  | -1.44944 | -0.00933 |
| H | -0.24976 | -1.86155 | -0.66799 |
| O | -2.58951 | 0.00807  | 0.15607  |
| H | -2.69841 | 0.96953  | 0.28340  |
| H | -2.90411 | -0.45004 | 0.95862  |
| C | 1.13255  | -0.28348 | 1.74427  |
| C | 2.39128  | 0.56376  | 1.96350  |
| H | 3.17671  | 0.32550  | 1.24406  |
| H | 2.78960  | 0.36258  | 2.95912  |
| C | -0.07239 | 0.25892  | 2.52137  |
| H | -0.94072 | -0.38407 | 2.34177  |
| H | -0.32821 | 1.25523  | 2.13963  |
| C | 0.16619  | 0.34591  | 4.02778  |
| H | 0.50641  | -0.62867 | 4.39516  |
| H | 0.96825  | 1.05919  | 4.23701  |
| H | 1.34828  | -1.29466 | 2.11000  |
| C | -1.09551 | 0.76966  | 4.77377  |
| H | -1.90351 | 0.05041  | 4.61394  |
| H | -0.91859 | 0.84337  | 5.84901  |
| H | -1.44322 | 1.74568  | 4.42344  |
| H | 2.18014  | 1.63274  | 1.90340  |

Group sBut

Reactant

|   |         |          |          |
|---|---------|----------|----------|
| O | 0.77284 | -1.89683 | -1.56173 |
| O | 0.05326 | 0.10052  | 0.45976  |

Transition State

|   |          |          |          |
|---|----------|----------|----------|
| O | -0.72145 | -1.29909 | 0.29686  |
| O | 0.30069  | 0.58002  | -0.33124 |

|   |          |          |          |   |          |          |          |
|---|----------|----------|----------|---|----------|----------|----------|
| C | 0.01674  | 1.24473  | -0.43933 | C | 1.28707  | 1.10987  | -1.22151 |
| H | 0.63990  | 2.03758  | -0.03165 | H | 2.27974  | 1.09840  | -0.77160 |
| H | 0.36875  | 0.92263  | -1.41838 | H | 1.30161  | 0.55465  | -2.15991 |
| H | -1.02727 | 1.53754  | -0.46867 | H | 0.98709  | 2.13900  | -1.41182 |
| C | 1.15944  | -0.48140 | 0.68726  | C | 0.53651  | -0.65975 | 0.30039  |
| H | -0.16741 | -1.63871 | -1.57471 | H | -1.64907 | 0.32073  | -0.10088 |
| O | 2.21975  | 0.04413  | 0.19542  | O | 1.45115  | -1.37389 | -0.47138 |
| H | 3.02888  | -0.45238 | 0.41916  | H | 1.77765  | -2.12433 | 0.04260  |
| H | 1.21667  | -1.24293 | -2.11297 | H | -0.84242 | -1.70124 | -0.57619 |
| O | -1.94964 | -1.20252 | -1.39499 | O | -2.51940 | 0.80227  | -0.13057 |
| H | -2.01958 | -1.00344 | -0.45340 | H | -2.36293 | 1.75718  | -0.00658 |
| H | -2.09946 | -0.35435 | -1.82927 | H | -3.08400 | 0.47748  | 0.59591  |
| C | 1.14707  | -1.66451 | 1.59152  | C | 0.95424  | -0.47329 | 1.76160  |
| H | 0.24028  | -2.21669 | 1.32744  | H | 0.08466  | -0.01260 | 2.24429  |
| C | 1.01019  | -1.12841 | 3.03016  | C | 2.14939  | 0.46977  | 1.87897  |
| H | 1.90206  | -0.56321 | 3.30956  | H | 2.43744  | 0.58160  | 2.92525  |
| H | 0.90041  | -1.97080 | 3.71218  | H | 3.01085  | 0.07250  | 1.33432  |
| C | 2.38166  | -2.55152 | 1.40252  | C | 1.23005  | -1.82427 | 2.43821  |
| H | 3.26764  | -2.02106 | 1.77076  | H | 2.21251  | -2.19280 | 2.11815  |
| H | 2.52651  | -2.74274 | 0.33598  | H | 0.48688  | -2.55671 | 2.11192  |
| C | 2.24622  | -3.87972 | 2.14024  | C | 1.20093  | -1.73512 | 3.96235  |
| H | 1.34223  | -4.40561 | 1.82322  | H | 1.96423  | -1.05398 | 4.34393  |
| H | 3.10371  | -4.51823 | 1.92248  | H | 0.22658  | -1.37924 | 4.30756  |
| H | 2.20080  | -3.73948 | 3.22141  | H | 1.37860  | -2.71534 | 4.40927  |
| H | 0.13359  | -0.48782 | 3.13002  | H | 1.91966  | 1.46378  | 1.49164  |

Group tBuCH2\_2\_CH

Reactant

|   |          |          |          |
|---|----------|----------|----------|
| O | -3.19832 | -2.94150 | 0.62304  |
| O | -1.68801 | 0.26862  | -0.47586 |
| C | -2.93752 | 0.20064  | -1.22396 |
| H | -3.51118 | 1.05214  | -0.87424 |
| H | -2.70643 | 0.28486  | -2.28419 |
| H | -3.43603 | -0.73947 | -0.99673 |
| C | -0.80678 | -0.62896 | -0.63903 |
| H | -3.20310 | -2.05315 | 1.02302  |
| O | -1.07787 | -1.58523 | -1.45354 |
| H | -0.34913 | -2.22958 | -1.52475 |
| H | -2.68321 | -2.84642 | -0.18521 |
| O | -3.32977 | -0.45485 | 1.95704  |
| H | -3.97573 | 0.12953  | 1.54269  |
| H | -2.49343 | 0.02073  | 1.88312  |
| C | 0.42816  | -0.59189 | 0.17952  |
| C | 0.94969  | 0.82863  | 0.42348  |
| H | 0.11600  | 1.45314  | 0.76164  |
| C | 0.05677  | -1.32692 | 1.50979  |
| H | 0.03337  | -0.57422 | 2.30405  |
| C | 1.66373  | 1.50075  | -0.76409 |

Transition State

|   |          |          |          |
|---|----------|----------|----------|
| O | 1.07426  | 0.01253  | -1.21897 |
| O | 1.95639  | -0.46212 | 0.83784  |
| C | 3.23664  | -1.07748 | 0.63246  |
| H | 3.21209  | -2.12652 | 0.92489  |
| H | 3.55619  | -0.98743 | -0.40902 |
| H | 3.92990  | -0.53305 | 1.27139  |
| C | 0.93526  | -0.80369 | -0.06989 |
| H | 2.36854  | 1.20375  | -0.14693 |
| O | 1.12207  | -2.13678 | -0.42336 |
| H | 0.38231  | -2.41560 | -0.97805 |
| H | 1.71156  | -0.40826 | -1.81390 |
| O | 2.89207  | 2.04624  | -0.15029 |
| H | 3.12899  | 2.26335  | 0.77192  |
| H | 2.33139  | 2.76208  | -0.50692 |
| C | -0.42592 | -0.49801 | 0.58001  |
| C | -0.69183 | -1.42539 | 1.79519  |
| C | -1.62974 | -2.65498 | 1.67910  |
| C | -0.45679 | 1.00490  | 0.97168  |
| H | -0.29919 | 1.08444  | 2.05244  |
| H | 0.38068  | 1.52753  | 0.50769  |

|   |          |          |          |   |          |          |          |
|---|----------|----------|----------|---|----------|----------|----------|
| C | 1.02118  | -2.46420 | 1.88703  | H | -1.16573 | -0.69209 | -0.20517 |
| H | 1.16842  | -1.18206 | -0.36476 | H | -1.11753 | -0.80586 | 2.59107  |
| C | 1.97358  | 2.94374  | -0.35464 | H | 0.27438  | -1.77642 | 2.17634  |
| H | 2.58627  | 2.96770  | 0.55150  | C | -1.70234 | 1.83235  | 0.59869  |
| H | 2.52020  | 3.45896  | -1.14939 | C | -1.60963 | -3.34036 | 3.05232  |
| H | 1.05172  | 3.49906  | -0.15838 | H | -0.60420 | -3.69649 | 3.29632  |
| C | 0.58035  | -2.99569 | 3.25429  | H | -1.92580 | -2.64880 | 3.83918  |
| H | -0.44958 | -3.36318 | 3.21462  | H | -2.28674 | -4.19932 | 3.06300  |
| H | 1.22544  | -3.82090 | 3.56842  | C | -3.06949 | -2.23670 | 1.37101  |
| H | 0.63550  | -2.21060 | 4.01383  | H | -3.14900 | -1.77098 | 0.38487  |
| H | 1.65355  | 0.76499  | 1.25898  | H | -3.71867 | -3.11774 | 1.37279  |
| H | -0.95073 | -1.75415 | 1.45192  | H | -3.44772 | -1.53500 | 2.11941  |
| C | 2.97974  | 0.77784  | -1.07037 | C | -1.20205 | -3.68204 | 0.62808  |
| H | 3.62694  | 0.76126  | -0.18827 | H | -1.85405 | -4.55834 | 0.69550  |
| H | 2.81595  | -0.25362 | -1.39506 | H | -1.30862 | -3.28606 | -0.38671 |
| H | 3.51300  | 1.29450  | -1.87360 | H | -0.17229 | -4.01374 | 0.77650  |
| C | 0.78666  | 1.51634  | -2.02042 | C | -2.97330 | 1.27007  | 1.23330  |
| H | 0.60104  | 0.50573  | -2.40263 | H | -3.81431 | 1.94835  | 1.05845  |
| H | -0.17519 | 2.00194  | -1.83102 | H | -3.23197 | 0.30279  | 0.80349  |
| H | 1.29213  | 2.06682  | -2.81875 | H | -2.85469 | 1.14741  | 2.31472  |
| C | 0.92771  | -3.59738 | 0.85977  | C | -1.47266 | 3.25409  | 1.12367  |
| H | -0.10372 | -3.95335 | 0.77034  | H | -2.31434 | 3.90183  | 0.86164  |
| H | 1.27036  | -3.28538 | -0.13201 | H | -1.36918 | 3.25552  | 2.21306  |
| H | 1.55332  | -4.43879 | 1.17055  | H | -0.56366 | 3.68768  | 0.69466  |
| C | 2.46085  | -1.95274 | 1.98244  | C | -1.87072 | 1.89256  | -0.92259 |
| H | 2.82464  | -1.57227 | 1.02285  | H | -0.98221 | 2.32259  | -1.39557 |
| H | 2.54019  | -1.14908 | 2.72075  | H | -2.04005 | 0.90172  | -1.35318 |
| H | 3.12624  | -2.76438 | 2.29022  | H | -2.72975 | 2.51833  | -1.18296 |

Group tBuCH2Me2C

Reactant

|   |          |          |          |
|---|----------|----------|----------|
| O | 2.40971  | -1.16582 | -1.62466 |
| O | 0.64009  | 1.01735  | -0.29622 |
| C | 1.74861  | 1.55014  | 0.48264  |
| H | 1.46656  | 1.55634  | 1.53412  |
| H | 2.62682  | 0.93038  | 0.30924  |
| H | 1.89024  | 2.55695  | 0.10463  |
| C | 0.23568  | -0.16827 | -0.08527 |
| H | 2.44094  | -0.26059 | -1.98592 |
| O | 0.81782  | -0.83601 | 0.84072  |
| H | 0.45559  | -1.73662 | 0.93026  |
| H | 2.91471  | -1.12387 | -0.80533 |
| O | 2.41401  | 1.42018  | -2.72781 |
| H | 1.52468  | 1.75073  | -2.55182 |
| H | 2.99006  | 1.98659  | -2.20065 |
| C | -0.92370 | -0.67258 | -0.88641 |
| C | -1.01740 | -2.20042 | -0.80469 |
| H | -1.86267 | -2.51873 | -1.41636 |

Transition State

|   |          |          |          |
|---|----------|----------|----------|
| O | 1.72732  | 0.40873  | -0.88509 |
| O | 2.00517  | -1.37795 | 0.51256  |
| C | 3.11206  | -2.10093 | -0.04258 |
| H | 3.77470  | -2.31241 | 0.79482  |
| H | 2.78008  | -3.03525 | -0.49376 |
| H | 3.64736  | -1.50082 | -0.78319 |
| C | 1.12152  | -0.77439 | -0.39723 |
| H | 2.92489  | 0.31778  | 0.79225  |
| O | 0.92865  | -1.65409 | -1.46167 |
| H | 0.31198  | -1.25252 | -2.08747 |
| H | 2.29861  | 0.17061  | -1.62842 |
| O | 3.54299  | 0.86565  | 1.34199  |
| H | 3.59734  | 0.46027  | 2.22902  |
| H | 3.15840  | 1.75928  | 1.43117  |
| C | -0.16565 | -0.38304 | 0.36422  |
| C | -0.75152 | -1.51903 | 1.24828  |
| H | -1.65689 | -1.06680 | 1.67067  |

|   |          |          |          |   |          |          |          |
|---|----------|----------|----------|---|----------|----------|----------|
| H | -0.11181 | -2.65828 | -1.21079 | C | 0.17493  | 0.75273  | 1.34863  |
| C | -2.22107 | 0.05459  | -0.40232 | H | -0.72346 | 1.01313  | 1.91284  |
| H | -3.02291 | -0.47641 | -0.92623 | H | 0.51721  | 1.64837  | 0.82775  |
| C | -2.61797 | 0.18613  | 1.08564  | C | -1.15803 | -2.94264 | 0.78582  |
| H | -1.18754 | -2.58093 | 0.20296  | H | 0.93991  | 0.44433  | 2.06574  |
| H | -2.18747 | 1.06792  | -0.81473 | H | -0.06815 | -1.65516 | 2.09378  |
| C | -1.72729 | 1.18509  | 1.83864  | C | 0.04506  | -3.87962 | 0.62121  |
| H | -0.73266 | 0.78751  | 2.05578  | H | 0.66425  | -3.87893 | 1.52403  |
| H | -1.61713 | 2.11897  | 1.27946  | H | -0.30739 | -4.90278 | 0.45593  |
| H | -2.18279 | 1.42062  | 2.80469  | H | 0.66990  | -3.59998 | -0.22475 |
| C | -2.62422 | -1.14799 | 1.83681  | C | -2.01905 | -3.50683 | 1.92895  |
| H | -3.08017 | -1.00930 | 2.82151  | H | -1.47173 | -3.48738 | 2.87661  |
| H | -3.20053 | -1.90591 | 1.29837  | H | -2.93615 | -2.92356 | 2.05390  |
| H | -1.61096 | -1.52600 | 1.99585  | H | -2.29916 | -4.54322 | 1.72009  |
| C | -4.04794 | 0.74624  | 1.07374  | C | -2.00588 | -2.96372 | -0.48970 |
| H | -4.73416 | 0.05236  | 0.57994  | H | -1.42334 | -2.69723 | -1.37330 |
| H | -4.39982 | 0.90719  | 2.09613  | H | -2.40412 | -3.97139 | -0.64558 |
| H | -4.08878 | 1.70266  | 0.54387  | H | -2.85352 | -2.27618 | -0.41205 |
| C | -0.70973 | -0.27015 | -2.35807 | C | -1.19747 | 0.17308  | -0.62863 |
| H | 0.17181  | -0.76029 | -2.77333 | H | -1.51990 | -0.54982 | -1.37809 |
| H | -1.58810 | -0.59193 | -2.92061 | H | -2.08665 | 0.48357  | -0.07479 |
| H | -0.60910 | 0.81053  | -2.46457 | H | -0.79939 | 1.05097  | -1.14291 |

Group tBuCH2MeCH

Reactant

|   |          |          |          |
|---|----------|----------|----------|
| O | 1.39217  | 1.49287  | -1.17400 |
| O | 2.16200  | -0.47419 | 0.85231  |
| C | 3.58416  | -0.47484 | 0.54012  |
| H | 3.91811  | -1.50263 | 0.41571  |
| H | 3.73877  | 0.10739  | -0.36714 |
| H | 4.05424  | -0.00670 | 1.39817  |
| C | 1.33953  | -0.94854 | 0.00813  |
| H | 1.86904  | 1.87918  | -0.41652 |
| O | 1.81893  | -1.48273 | -1.05443 |
| H | 1.12512  | -1.84005 | -1.63835 |
| H | 2.08494  | 1.19895  | -1.77585 |
| O | 2.67320  | 2.57532  | 1.08917  |
| H | 3.62881  | 2.49541  | 0.98576  |
| H | 2.45932  | 1.97456  | 1.81302  |
| C | -0.10632 | -0.95749 | 0.35946  |
| C | -0.28527 | -2.22416 | 1.24195  |
| H | 0.46072  | -2.16529 | 2.04084  |
| C | -1.66481 | -2.42667 | 1.90802  |
| H | -0.04758 | -3.10692 | 0.63732  |
| C | -2.18224 | -1.11898 | 2.50962  |
| H | -2.42504 | -0.38609 | 1.73477  |
| H | -3.09198 | -1.30821 | 3.08632  |
| H | -1.44040 | -0.67640 | 3.18177  |

Transition State

|   |          |          |          |
|---|----------|----------|----------|
| O | 1.49597  | 0.79699  | -1.44739 |
| O | 2.55407  | 0.00470  | 0.30860  |
| C | 2.77863  | -0.85665 | 1.42313  |
| H | 1.93866  | -0.82766 | 2.12145  |
| H | 2.95970  | -1.88092 | 1.09190  |
| H | 3.67010  | -0.47550 | 1.91787  |
| C | 1.51832  | -0.31743 | -0.59359 |
| H | 1.92864  | 1.89723  | 0.12963  |
| O | 1.94115  | -1.45275 | -1.29362 |
| H | 1.19035  | -1.82461 | -1.77552 |
| H | 2.33840  | 0.80627  | -1.92561 |
| O | 1.66345  | 2.72153  | 0.61453  |
| H | 1.81399  | 2.58892  | 1.56989  |
| H | 0.70896  | 2.86680  | 0.46663  |
| C | 0.13103  | -0.45657 | 0.09020  |
| C | -0.14096 | -1.91853 | 0.49269  |
| H | 0.77615  | -2.34394 | 0.90350  |
| C | -1.27176 | -2.19659 | 1.52059  |
| H | -0.36038 | -2.49852 | -0.41256 |
| C | -1.36716 | -1.09393 | 2.57838  |
| H | -1.70975 | -0.14842 | 2.14832  |
| H | -2.08000 | -1.38496 | 3.35558  |
| H | -0.39763 | -0.92160 | 3.05693  |

|   |          |          |          |   |          |          |          |
|---|----------|----------|----------|---|----------|----------|----------|
| C | -2.70114 | -3.00855 | 0.93870  | C | -2.63745 | -2.38631 | 0.84647  |
| H | -2.98104 | -2.31009 | 0.15010  | H | -2.99848 | -1.48219 | 0.35544  |
| H | -2.32226 | -3.92202 | 0.47065  | H | -2.58819 | -3.18260 | 0.09761  |
| H | -3.61107 | -3.26545 | 1.48915  | H | -3.38252 | -2.67461 | 1.59449  |
| C | -1.45098 | -3.44732 | 3.03407  | C | -0.91993 | -3.51735 | 2.21958  |
| H | -0.76379 | -3.05760 | 3.79025  | H | 0.01031  | -3.42124 | 2.78750  |
| H | -2.40168 | -3.68085 | 3.52107  | H | -1.71515 | -3.81385 | 2.90969  |
| H | -1.03296 | -4.37869 | 2.63971  | H | -0.78899 | -4.32005 | 1.48686  |
| C | -0.98429 | -0.90072 | -0.89019 | H | 0.21083  | 0.15713  | 0.99338  |
| H | -1.02156 | -1.86924 | -1.39759 | C | -0.99038 | 0.12148  | -0.77346 |
| H | -1.99962 | -0.63182 | -0.60546 | H | -1.11726 | -0.45842 | -1.69290 |
| H | -0.62099 | -0.14339 | -1.58661 | H | -1.92812 | 0.09482  | -0.22055 |
| H | -0.25710 | -0.06905 | 0.97681  | H | -0.79782 | 1.15973  | -1.04221 |

Group tBuCH2

Reactant

|   |          |          |          |
|---|----------|----------|----------|
| O | -2.24479 | -0.61664 | -1.74378 |
| O | -0.99122 | 0.42355  | 0.72994  |
| C | -1.98608 | 1.44644  | 1.01952  |
| H | -1.47934 | 2.39466  | 1.18551  |
| H | -2.67630 | 1.50562  | 0.17909  |
| H | -2.48235 | 1.09989  | 1.91957  |
| C | -0.26346 | 0.53695  | -0.30530 |
| H | -2.68582 | -0.89253 | -0.91934 |
| O | -0.39015 | 1.60688  | -1.00198 |
| H | 0.18542  | 1.61414  | -1.78730 |
| H | -2.61286 | 0.25198  | -1.93962 |
| O | -3.39683 | -1.46499 | 0.68702  |
| H | -3.96440 | -0.77153 | 1.04393  |
| H | -2.64451 | -1.49301 | 1.29053  |
| C | 0.72137  | -0.52816 | -0.59511 |
| C | 2.08297  | -0.30917 | 0.13177  |
| C | 2.95962  | -1.50336 | -0.25237 |
| H | 3.10408  | -1.54996 | -1.33504 |
| H | 3.93956  | -1.40754 | 0.22195  |
| H | 2.50716  | -2.44200 | 0.07835  |
| C | 2.74472  | 0.98736  | -0.33866 |
| H | 2.86030  | 0.99625  | -1.42637 |
| H | 2.16591  | 1.86771  | -0.04394 |
| H | 3.73653  | 1.07621  | 0.11161  |
| C | 1.88894  | -0.28076 | 1.64868  |
| H | 1.32282  | 0.59780  | 1.96905  |
| H | 1.36496  | -1.17609 | 1.99458  |
| H | 2.86563  | -0.24464 | 2.13789  |
| H | 0.88333  | -0.55046 | -1.67536 |
| H | 0.28108  | -1.47145 | -0.26800 |

Transition State

|   |          |          |          |
|---|----------|----------|----------|
| O | 0.83217  | 0.50566  | -1.16965 |
| O | 1.74080  | -1.18971 | 0.06445  |
| C | 2.56782  | -1.88900 | -0.87464 |
| H | 2.12931  | -2.85400 | -1.12762 |
| H | 2.72514  | -1.30039 | -1.78215 |
| H | 3.52250  | -2.03906 | -0.37433 |
| C | 0.53830  | -0.67034 | -0.42941 |
| H | 2.48344  | 0.65243  | -0.07418 |
| O | -0.03656 | -1.61901 | -1.27563 |
| H | -0.97080 | -1.40376 | -1.39109 |
| H | 1.04902  | 0.25575  | -2.07876 |
| O | 3.17744  | 1.28267  | 0.25060  |
| H | 3.39635  | 1.06397  | 1.17643  |
| H | 2.80632  | 2.18526  | 0.22279  |
| C | -0.34448 | -0.22872 | 0.73030  |
| C | -0.63520 | -1.21367 | 1.88185  |
| C | -1.81801 | -0.62272 | 2.66095  |
| H | -2.71184 | -0.56722 | 2.03295  |
| H | -2.04811 | -1.24391 | 3.53085  |
| H | -1.58657 | 0.38657  | 3.01519  |
| C | -1.02262 | -2.60664 | 1.37735  |
| H | -0.18289 | -3.10255 | 0.88476  |
| H | -1.33449 | -3.22674 | 2.22299  |
| H | -1.85472 | -2.55538 | 0.66874  |
| C | 0.55445  | -1.33195 | 2.84299  |
| H | 1.40966  | -1.82024 | 2.37538  |
| H | 0.86979  | -0.34397 | 3.19299  |
| H | 0.26274  | -1.92139 | 3.71734  |
| H | -1.29081 | 0.07760  | 0.27063  |
| H | 0.11072  | 0.67531  | 1.14744  |

Group tBuMeCH

| Reactant |          |          | Transition State |   |          |          |          |
|----------|----------|----------|------------------|---|----------|----------|----------|
| O        | -2.50237 | -0.38862 | -1.73435         | O | 0.45377  | 0.41801  | -0.99099 |
| O        | -0.98435 | 0.55073  | 0.76779          | O | 1.90205  | -0.40687 | 0.47929  |
| C        | -1.95105 | 1.59907  | 1.06329          | C | 2.86588  | -1.45001 | 0.63751  |
| H        | -1.42018 | 2.54068  | 1.18572          | H | 3.65338  | -1.02491 | 1.25812  |
| H        | -2.66846 | 1.65010  | 0.24618          | H | 2.43788  | -2.31769 | 1.13959  |
| H        | -2.42134 | 1.28543  | 1.98897          | H | 3.28299  | -1.74755 | -0.32503 |
| C        | -0.29547 | 0.61266  | -0.29682         | C | 0.65619  | -0.68178 | -0.13262 |
| H        | -2.81164 | -0.71068 | -0.86773         | H | 2.00651  | 1.35284  | -0.30976 |
| O        | -0.45083 | 1.64838  | -1.03748         | O | 0.80263  | -1.86019 | -0.86467 |
| H        | 0.08863  | 1.61682  | -1.84721         | H | -0.03417 | -2.07400 | -1.29561 |
| H        | -2.84219 | 0.51043  | -1.79995         | H | 0.91635  | 0.23031  | -1.82173 |
| O        | -3.27220 | -1.40385 | 0.77894          | O | 2.65534  | 2.10952  | -0.30712 |
| H        | -3.81319 | -0.75281 | 1.24136          | H | 3.15026  | 2.08650  | 0.53304  |
| H        | -2.43331 | -1.40194 | 1.25610          | H | 2.17692  | 2.95750  | -0.36250 |
| C        | 0.68555  | -0.47294 | -0.57722         | C | -0.45563 | -0.69763 | 0.93451  |
| C        | 2.06485  | -0.12341 | 0.10369          | C | -1.90575 | -1.05231 | 0.46034  |
| C        | 3.12265  | -1.04772 | -0.50728         | C | -2.87772 | -0.46272 | 1.49614  |
| H        | 3.19052  | -0.90133 | -1.58868         | H | -2.79769 | 0.62766  | 1.52385  |
| H        | 4.09622  | -0.81439 | -0.06868         | H | -3.90567 | -0.72115 | 1.22716  |
| H        | 2.91148  | -2.10009 | -0.30952         | H | -2.69124 | -0.84598 | 2.50156  |
| C        | 2.45769  | 1.32779  | -0.19508         | C | -2.28073 | -0.43115 | -0.89299 |
| H        | 2.41711  | 1.53778  | -1.26876         | H | -1.71581 | -0.84678 | -1.73148 |
| H        | 1.81369  | 2.04328  | 0.32521          | H | -3.33926 | -0.62860 | -1.08468 |
| H        | 3.48128  | 1.50048  | 0.14458          | H | -2.13158 | 0.65040  | -0.88957 |
| C        | 2.01307  | -0.33156 | 1.61860          | C | -2.15698 | -2.56807 | 0.39557  |
| H        | 1.22917  | 0.26981  | 2.08647          | H | -1.47542 | -3.09261 | -0.27957 |
| H        | 1.84922  | -1.37967 | 1.87683          | H | -2.07046 | -3.03190 | 1.38035  |
| H        | 2.97026  | -0.02642 | 2.04941          | H | -3.17386 | -2.74454 | 0.03449  |
| C        | 0.10573  | -1.82796 | -0.16635         | C | -0.01055 | -1.58031 | 2.10644  |
| H        | -0.13659 | -1.85282 | 0.89668          | H | 0.21925  | -2.59479 | 1.77162  |
| H        | -0.80070 | -2.04027 | -0.73415         | H | 0.87641  | -1.17083 | 2.59048  |
| H        | 0.83005  | -2.61436 | -0.37482         | H | -0.79585 | -1.64968 | 2.85901  |
| H        | 0.85398  | -0.44873 | -1.65870         | H | -0.48959 | 0.34205  | 1.28063  |

| Group tBu |          |          | Transition State |   |          |          |          |
|-----------|----------|----------|------------------|---|----------|----------|----------|
| Reactant  |          |          | Transition State |   |          |          |          |
| O         | -1.25614 | -1.51527 | -0.66240         | O | -0.35447 | -1.35353 | 0.20203  |
| O         | 0.51557  | 0.52946  | 0.58057          | O | 0.22219  | 0.71886  | -0.23029 |
| C         | 0.60611  | 1.36288  | -0.60924         | C | 1.06916  | 1.86087  | -0.36444 |
| H         | 1.65461  | 1.53736  | -0.84030         | H | 1.01733  | 2.48692  | 0.52782  |
| H         | 0.09635  | 0.85463  | -1.42580         | H | 2.09976  | 1.56263  | -0.55737 |
| H         | 0.10156  | 2.28387  | -0.33743         | H | 0.69186  | 2.42091  | -1.21891 |
| C         | 1.01461  | -0.63814 | 0.57274          | C | 0.72168  | -0.45898 | 0.35985  |
| H         | -1.70071 | -0.70982 | -0.34007         | H | -1.63419 | 0.05255  | 0.04272  |
| O         | 1.66274  | -0.99318 | -0.47438         | O | 1.80702  | -0.86474 | -0.42097 |
| H         | 2.01435  | -1.89916 | -0.41591         | H | 2.32904  | -1.52377 | 0.05482  |
| H         | -0.91514 | -1.28065 | -1.53267         | H | -0.37288 | -1.61964 | -0.72908 |



|   |          |          |          |   |          |          |         |
|---|----------|----------|----------|---|----------|----------|---------|
| O | -2.46218 | 0.78624  | 0.44321  | O | -2.59526 | 0.29200  | 0.13743 |
| H | -1.83532 | 0.96813  | 1.15440  | H | -2.67934 | 1.25375  | 0.27846 |
| H | -2.36190 | 1.53113  | -0.16140 | H | -2.95097 | -0.17210 | 0.91882 |
| C | 0.91589  | -1.45586 | 1.82628  | C | 1.03577  | -0.35856 | 1.87728 |
| C | 1.03358  | -2.95132 | 1.52188  | C | 1.15123  | -1.77469 | 2.46253 |
| H | 2.01858  | -3.21596 | 1.12615  | H | 1.47356  | -1.69850 | 3.50337 |
| H | 0.91035  | -3.49406 | 2.46011  | H | 0.19668  | -2.30053 | 2.43666 |
| H | 0.25957  | -3.28020 | 0.82625  | H | 1.89308  | -2.38065 | 1.93265 |
| C | -0.40094 | -1.14942 | 2.54572  | C | -0.10845 | 0.38091  | 2.57734 |
| H | -0.42329 | -1.73184 | 3.46832  | H | 0.07838  | 0.38987  | 3.65391 |
| H | -0.47798 | -0.09240 | 2.80497  | H | -0.18524 | 1.41644  | 2.23719 |
| H | -1.25799 | -1.43354 | 1.93225  | H | -1.06737 | -0.11549 | 2.40595 |
| C | 2.11272  | -0.99754 | 2.69067  | C | 2.36104  | 0.37087  | 2.13899 |
| H | 2.09267  | -1.57719 | 3.61544  | H | 2.54254  | 0.36728  | 3.21648 |
| H | 3.06088  | -1.18261 | 2.18169  | H | 3.20340  | -0.13406 | 1.66004 |
| H | 2.03452  | 0.06294  | 2.93608  | H | 2.34815  | 1.40978  | 1.81278 |
